# Supplementary material for: The importance of molecular characters when morphological variability hinders diagnosability: systematics of the moon jellyfish genus Aurelia (Cnidaria: Scyphozoa)
Source: PubMed Central journal article supplement (PMC8435205; doi:10.7717/peerj.11954), 2021-09-09
Supplement: peerj-09-11954-s003.pdf [file peerj-09-11954-s003.pdf]

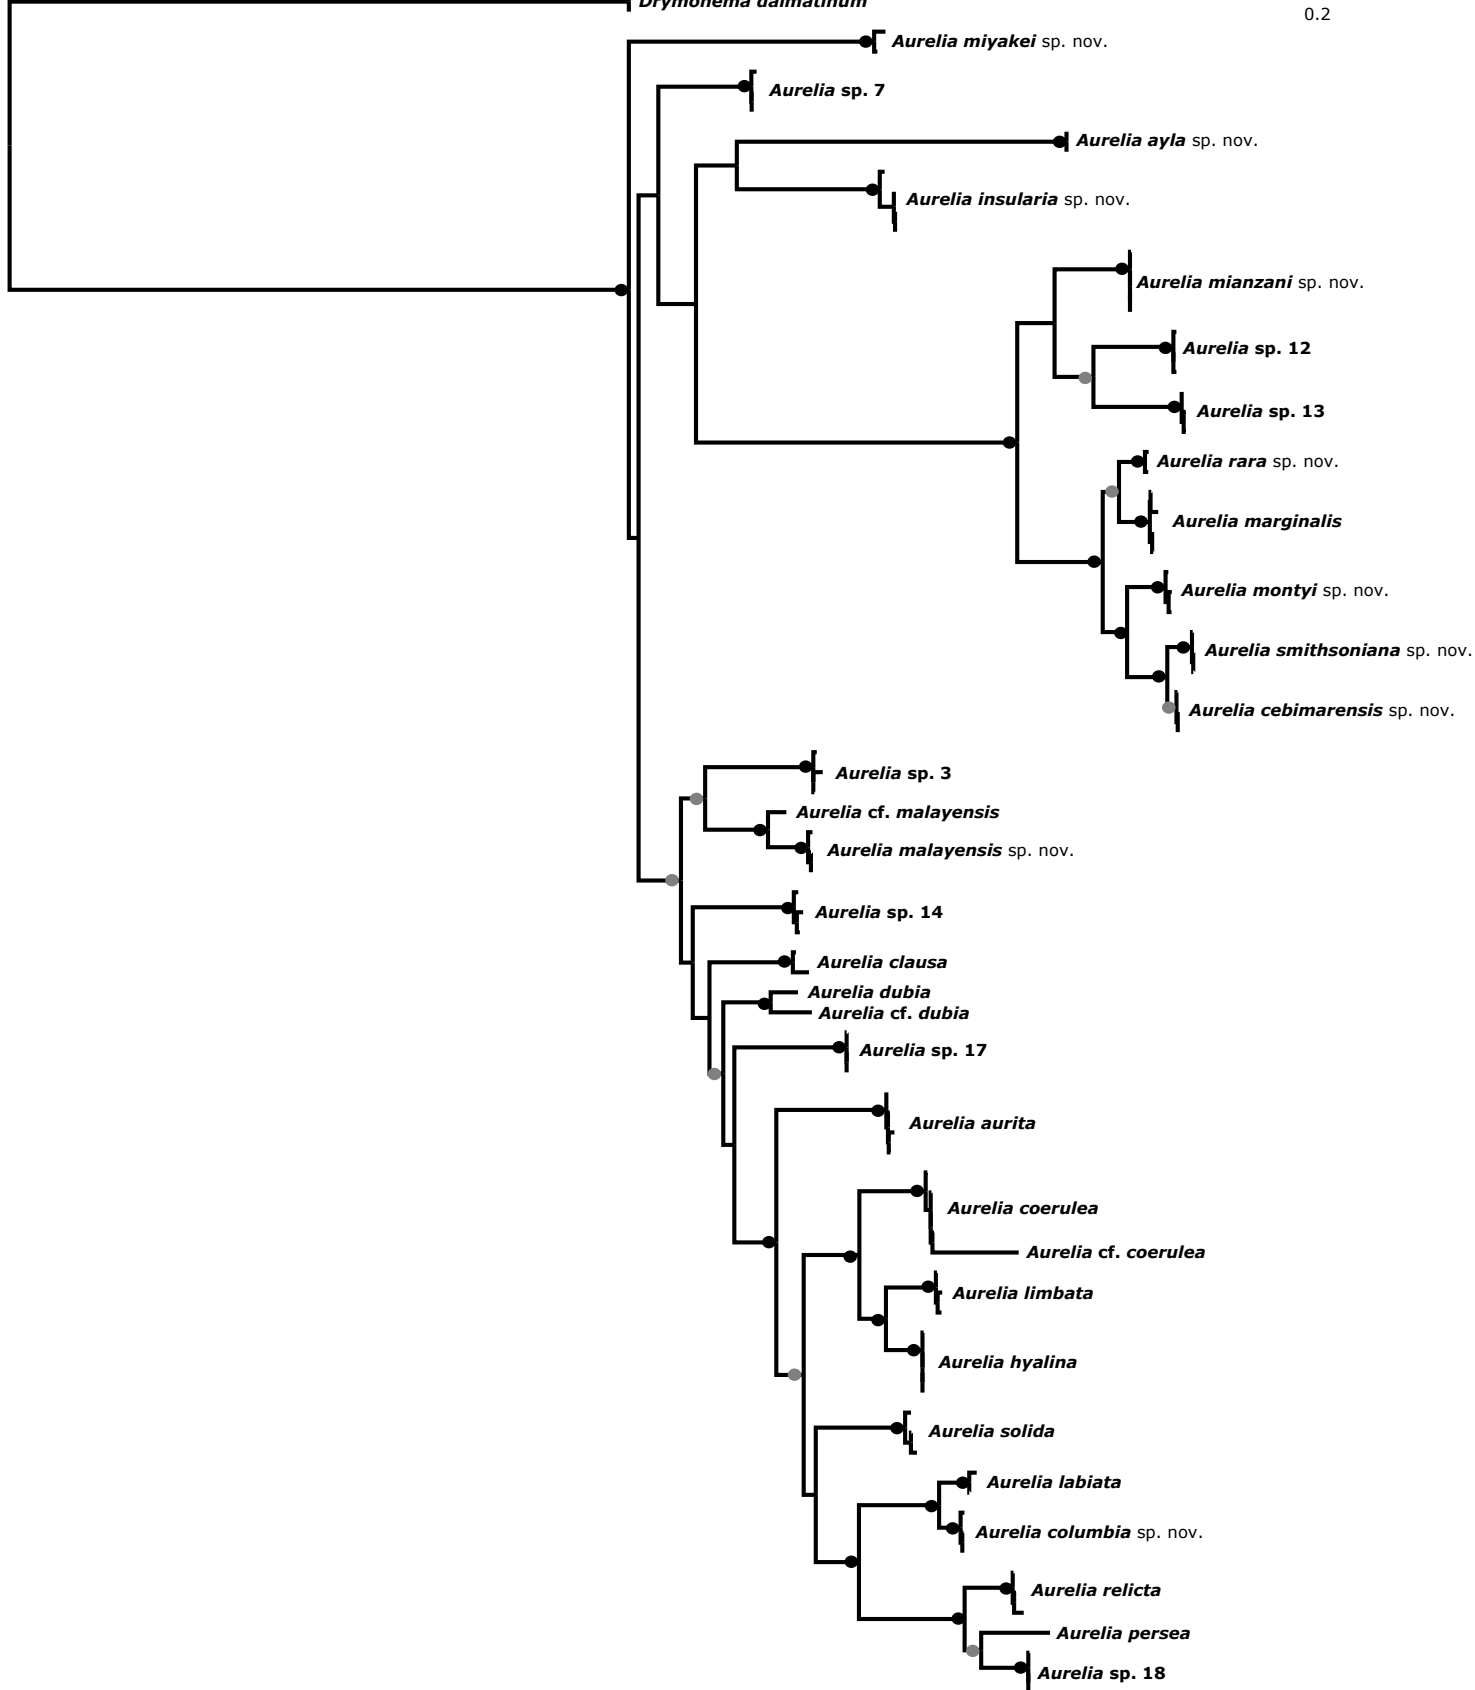

**Figure S3. Concatenated phylogenetic analysis combining markers 16S, COI, ITS1 and 28S, reconstructing relationships between 28 *Aurelia* species hypotheses under maximum likelihood as the optimality criterion. Colored circles represent bootstrap resampling frequencies and SH-aLRT (black =  $\geq 95$ , grey =  $\geq 75$ , absent =  $< 75$ ). When both of these values were not in the same range the lowest one was considered. Scale bar represents the number of nucleotide substitutions per site. Tables S4-S5 contains further details on sequences used to reconstruct this phylogeny and single-marker phylogenies are presented in Figs. S4-S7.**
