# Supplementary material for: The importance of molecular characters when morphological variability hinders diagnosability: systematics of the moon jellyfish genus Aurelia (Cnidaria: Scyphozoa)
Source: PubMed Central journal article supplement (PMC8435205; doi:10.7717/peerj.11954), 2021-09-09
Supplement: peerj-09-11954-s007.pdf [file peerj-09-11954-s007.pdf]

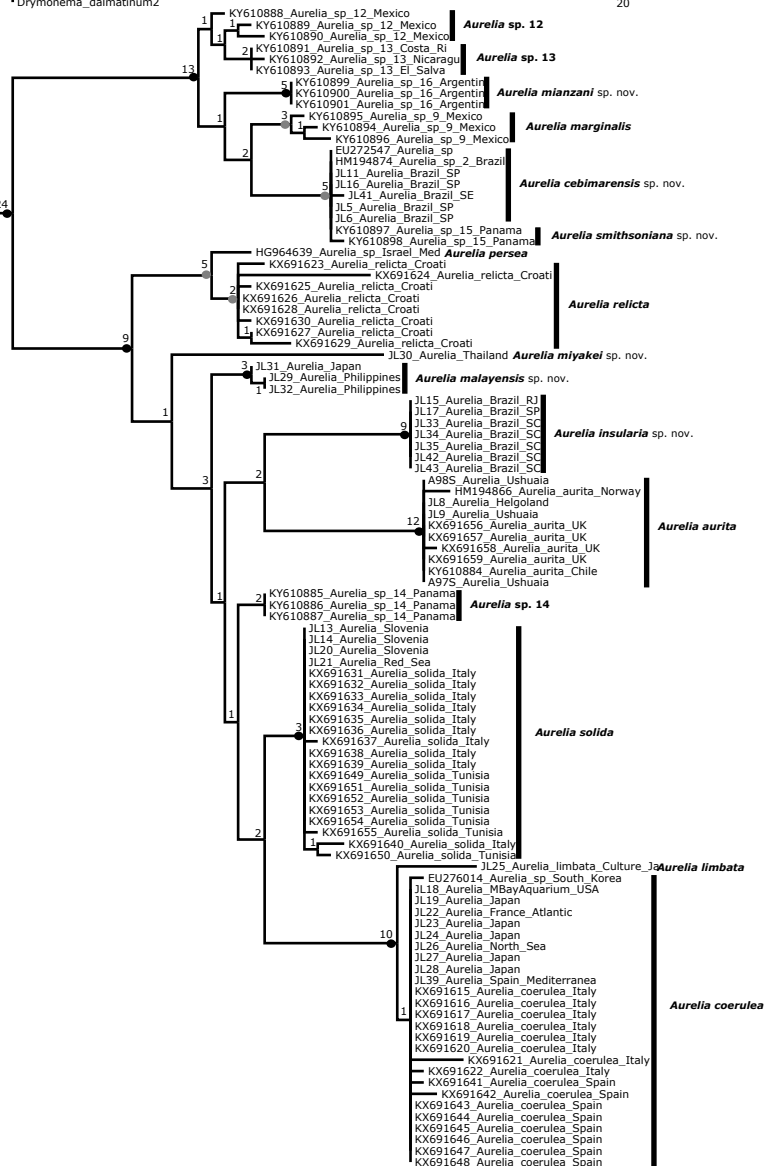

**Figure S7. 28S phylogenetic analysis under parsimony as the optimality criterion.** Numbers at nodes indicate Goodman-Bremer support values and colored circles represent bootstrap resampling frequencies (black =  $\geq 95$ , grey =  $\geq 75$ , absent =  $< 75$ ). Scale bar represents the number of nucleotide transformations. Table S4 contains further details on sequences used to reconstruct this phylogeny.
