# Supplementary material for: The importance of molecular characters when morphological variability hinders diagnosability: systematics of the moon jellyfish genus Aurelia (Cnidaria: Scyphozoa)
Source: PeerJ. 2021 Sep 9;9:e11954. doi: 10.7717/peerj.11954 (PMC8435205; doi:10.7717/peerj.11954)
Supplement: Supplemental Information 11 — BOLD accessions appear in bold and GenBank accessions in italics correspond to sequences generated in this study. Sequence ID corresponds to terminal names in single-marker phylogenies (Figs. S4-S7) and also contains information on which species these sequences were previously assigned to. The species assignment based on this study is also indicated below. Specimen vouchers highlighted in yellow refer to type specimens. Geographic coordinates are represented in decimal degrees and may be approximations based on locality reference. [file peerj-09-11954-s011.xlsx]

## Sheet: Table S4
Table S4. Sequences used in this study. BOLD accessions appear in bold and GenBank accessions in italics correspond to sequences generated in this study. Terminal names in single-marker phylogenies (Figs. S4-S7) can be identified based on sequence accessions or isolate, and also contains information on which species these sequences were previously assigned to. The species assignment based on this…
	GenBank/BOLD accession
Species (this study)	16S	COI	ITS1	28S	Isolate/Clone/Strain	Specimen voucher	Geographic coordinates	Locality	Country
Aurelia aurita				HM194866	M0D14615C		60.1880 N 5.5380 E	Bjornafjorden	Norway
Aurelia aurita		KX691612		KX691656	NSAM00035D_Oban		56.415 N 5.479 W	Oban	United Kingdom
Aurelia aurita		KX691613		KX691657	NSAM00035E_Orkney		59.042 N 2.751 W	Orkney	United Kingdom
Aurelia aurita		KX691614		KX691658	NSAM00035F_SAndrews		56.347 N 2.784 W	Saint Andrews	United Kingdom
Aurelia aurita		KX691611		KX691659	NSAM00035G_Southampton		50.873 N 1.381 W	Southampton	United Kingdom
Aurelia aurita	KY610660	KY564361		KY610884	M0D020052F_CLVSMAR		33.034650 S 71.617981 W	Marchant	Chile
Aurelia aurita	MZ061727	MZ052131		MZ061825	A97S		54.8778 S 68.2381 W	Ushuaia, Tierra del Fuego	Argentina
Aurelia aurita	MZ061728	MZ052132	MZ061859	MZ061826	A98S		54.8778 S 68.2381 W	Ushuaia, Tierra del Fuego	Argentina
Aurelia aurita	MZ061780	MZ052173	MZ061860	MZ061829	JL8	MZUSP8657	54.180 N 7.898 E	Helgoland	Germany
Aurelia aurita	MZ061781	MZ052174		MZ061830	JL9		54.8778 S 68.2381 W	Ushuaia, Tierra del Fuego	Argentina
Aurelia aurita			AF461406		NSS		54.744 N 8.273 E	Hörnum	Germany
Aurelia aurita			AY935205		RhodeIsland_Charlestown25		41.3801 N 71.6458 W	Charlestown, Rhode Island	USA
Aurelia aurita			AY935206		Bjornsund20		62.900 N 6.833 E	Bjornsund Fjord	Norway
Aurelia aurita			FR851959		7_1E		43.409464 N 34.294299 E	Black Sea
Aurelia aurita			FR851960		7_3E		43.409464 N 34.294299 E	Black Sea
Aurelia aurita			FR851961		bBosphorus		40.992395 N 29.000979 E	Bosphorus, Marmara Sea	Turkey
Aurelia aurita			FR851962		cBosphorus		40.992395 N 29.000979 E	Bosphorus, Marmara Sea	Turkey
Aurelia aurita			FR851963		1WhiteSea		65.863 N 39.741 E	White Sea
Aurelia aurita			FR851964		6WhiteSea		65.863 N 39.741 E	White Sea
Aurelia aurita			FR851965		16Gullmar		58.2666 N 11.4333 E	Gullmarn Fjord	Sweden
Aurelia aurita			FR851966		17Gullmar		58.2666 N 11.4333 E	Gullmarn Fjord	Sweden
Aurelia aurita			FR851967		30Greenwich		41.657739 N 71.445434 W	Greenwich Cove, Rhode Island	USA
Aurelia aurita			FR851968		8EBlackSea		43.409464 N 34.294299 E	Black Sea
Aurelia aurita			FR851969		dBosphorus1		40.992395 N 29.000979 E	Bosphorus, Marmara Sea	Turkey
Aurelia aurita			FR851970		5WhiteSea		65.863 N 39.741 E	White Sea
Aurelia aurita			FR851971		K04_11		42.878993 N 51.022505 E	Caspian Sea	Kazakhstan
Aurelia aurita			FR851972		K04_13		42.878993 N 51.022505 E	Caspian Sea	Kazakhstan
Aurelia aurita			FR851973		K04_14		42.878993 N 51.022505 E	Caspian Sea	Kazakhstan
Aurelia aurita			FR851974		K14_22		42.878993 N 51.022505 E	Caspian Sea	Kazakhstan
Aurelia aurita			FR851975		K14_23		42.878993 N 51.022505 E	Caspian Sea	Kazakhstan
Aurelia aurita			FR851976		K14_25		42.878993 N 51.022505 E	Caspian Sea	Kazakhstan
Aurelia aurita			HQ913992		AA0713		54.4230 N 10.2113 E	Kiel, North Sea	Germany
Aurelia aurita		HQ913914	HQ913993		AA0801		54.5944 N 18.6463 E	Gdynia, Baltic Sea	Poland
Aurelia aurita		HQ913915	HQ913994		AA0802		54.5944 N 18.6463 E	Gdynia, Baltic Sea	Poland
Aurelia aurita		HQ913916	HQ913995		AA0803		54.5944 N 18.6463 E	Gdynia, Baltic Sea	Poland
Aurelia aurita			HQ913996		AA0808		54.5944 N 18.6463 E	Gdynia, Baltic Sea	Poland
Aurelia aurita		HQ913917	HQ913997		AA0810		54.5944 N 18.6463 E	Gdynia, Baltic Sea	Poland
Aurelia aurita		HQ913918	HQ913998		AA1203		44.5719 N 38.0511 E	Gelendzik, Black Sea	Russia
Aurelia aurita			HQ913999		AA1231		44.5719 N 38.0511 E	Gelendzik, Black Sea	Russia
Aurelia aurita		HQ913938	HQ914013		AA2210
Aurelia aurita		HQ913941	HQ914015		AA2711		41.0055 N 39.7494 E	Trabzone, Black Sea	Turkey
Aurelia aurita		HQ913943	HQ914017		AA2721		41.0055 N 39.7494 E	Trabzone, Black Sea	Turkey
Aurelia aurita		HQ913944	HQ914018		AA2722		41.0055 N 39.7494 E	Trabzone, Black Sea	Turkey
Aurelia aurita		HQ913946	HQ914019		AX0801		44.5719 N 38.0511 E	Gelendzik, Black Sea	Russia
Aurelia aurita		HQ913948	HQ914020		AX0807		44.5719 N 38.0511 E	Gelendzik, Black Sea	Russia
Aurelia aurita		HQ913949	HQ914021		AX0808		44.5719 N 38.0511 E	Gelendzik, Black Sea	Russia
Aurelia aurita		HQ913950	HQ914022		AX0809		44.5719 N 38.0511 E	Gelendzik, Black Sea	Russia
Aurelia aurita		HQ913951	HQ914023		AX0810		44.5719 N 38.0511 E	Gelendzik, Black Sea	Russia
Aurelia aurita		HQ913956	HQ914024		AX0811		44.5719 N 38.0511 E	Gelendzik, Black Sea	Russia
Aurelia aurita		HQ913953	HQ914025		AX1902		54.9075 N 8.4222 E	Sylt, North Sea	Germany
Aurelia aurita		HQ913954	HQ914026		AX1903		54.9075 N 8.4222 E	Sylt, North Sea	Germany
Aurelia aurita		HQ913955	HQ914027		AX1904		54.9075 N 8.4222 E	Sylt, North Sea	Germany
Aurelia aurita			KC767901		White Sea		65.863 N 39.741 E	White Sea
Aurelia aurita	AF461399
Aurelia aurita	KY610661				M0D014615C_NOHOBLM		60.263000 N 5.226128 E	Blomsterdalen	Norway
Aurelia aurita	MZ061776	MZ052170			GR10-137		63.945050 N 52.932967 W	Labrador Sea	Greenland
Aurelia aurita	U19373
Aurelia aurita		ARCMI614-14					55.085000 N 59.171000 W	Makkovik, Newfoundland and Labrador	Canada
Aurelia aurita		ARCMI615-14					55.085000 N 59.171000 W	Makkovik, Newfoundland and Labrador	Canada
Aurelia aurita		ARCMI616-14					55.085000 N 59.171000 W	Makkovik, Newfoundland and Labrador	Canada
Aurelia aurita		ARCMI617-14					55.085000 N 59.171000 W	Makkovik, Newfoundland and Labrador	Canada
Aurelia aurita		ARCMI618-14					55.085000 N 59.171000 W	Makkovik, Newfoundland and Labrador	Canada
Aurelia aurita		AY428838
Aurelia aurita		AY903093			BostonHbr1		42.3573 N 71.0441 W	Boston Harbor, Massachusetts	USA
Aurelia aurita		AY903094			BostonHbr2		42.3573 N 71.0441 W	Boston Harbor, Massachusetts	USA
Aurelia aurita		AY903095			BostonHbr3		42.3573 N 71.0441 W	Boston Harbor, Massachusetts	USA
Aurelia aurita		AY903117			Bosporus2		41.000 N 29.000 E	Bosporus	Turkey
Aurelia aurita		AY903118			Gullmar15		58.2666 N 11.4333 E	Gullmarn Fjord	Sweden
Aurelia aurita		AY903208			Anglesey01		53.5000 N 4.6666 W	Aglesey, Wales	United Kingdom
Aurelia aurita		AY903209			Anglesey02		53.5000 N 4.6666 W	Aglesey, Wales	United Kingdom
Aurelia aurita		AY903210			Anglesey03		53.5000 N 4.6666 W	Aglesey, Wales	United Kingdom
Aurelia aurita		AY903211			Anglesey04		53.5000 N 4.6666 W	Aglesey, Wales	United Kingdom
Aurelia aurita		AY903212			Anglesey05		53.5000 N 4.6666 W	Aglesey, Wales	United Kingdom
Aurelia aurita		CAISN135-12					58.700000 N 94.200000 W	Churchill, Manitoba	Canada
Aurelia aurita		FJ858784					48.3495 S 74.1949 W	Paso de Isla Ofhidro	Chile
Aurelia aurita		HF968752				P-Jap1	40.7283 N 161.9282 E	Northwest Pacific Ocean
Aurelia aurita		HQ913913			AA0736		54.4230 N 10.2113 E	Kiel, North Sea	Germany
Aurelia aurita		HQ913919			AA1204		44.5719 N 38.0511 E	Gelendzik, Black Sea	Russia
Aurelia aurita		HQ913920			AA1205		44.5719 N 38.0511 E	Gelendzik, Black Sea	Russia
Aurelia aurita		HQ913921			AA1213		44.5719 N 38.0511 E	Gelendzik, Black Sea	Russia
Aurelia aurita		HQ913922			AA1220		44.5719 N 38.0511 E	Gelendzik, Black Sea	Russia
Aurelia aurita		HQ913923			AA1224		44.5719 N 38.0511 E	Gelendzik, Black Sea	Russia
Aurelia aurita		HQ913924			AA1225		44.5719 N 38.0511 E	Gelendzik, Black Sea	Russia
Aurelia aurita		HQ913940			AA2709		41.0055 N 39.7494 E	Trabzone, Black Sea	Turkey
Aurelia aurita		HQ913945			AX0703		44.5719 N 38.0511 E	Gelendzik, Black Sea	Russia
Aurelia aurita		HQ913947			AX0805		44.5719 N 38.0511 E	Gelendzik, Black Sea	Russia
Aurelia aurita		HQ913952			AX1901		54.9075 N 8.4222 E	Sylt, North Sea	Germany
Aurelia aurita		JQ623914			TR011EK				Turkey?
Aurelia aurita		JX995329			MT03817		54.5582 N 11.1555 E	Fehmarn Belt, Baltic Sea	Germany
Aurelia aurita		KC311384			TR142EK		41.8047 N 35.4150 E	Sinop	Turkey
Aurelia aurita		KC311385			TR143EK		41.8047 N 35.4150 E	Sinop	Turkey
Aurelia aurita		KC440127			MT03819		58.323 N 19.969 E	Baltic Sea
Aurelia aurita		KC789074				TR1944EK			Turkey?
Aurelia aurita		KC789075				TR1950EK			Turkey?
Aurelia aurita		KC789076				TR1951EK			Turkey?
Aurelia aurita		KC789077				TR1952EK			Turkey?
Aurelia aurita		KC789078				TR1953EK			Turkey?
Aurelia aurita		KC789079				TR1954EK			Turkey?
Aurelia aurita		KC789080				TR1955EK			Turkey?
Aurelia aurita		KC789081				TR1956EK			Turkey?
Aurelia aurita		KC789082				TR1957EK			Turkey?
Aurelia aurita		KC789083				TR1958EK			Turkey?
Aurelia aurita		KC789084				TR1959EK			Turkey?
Aurelia aurita		KC789085				TR1947EK			Turkey?
Aurelia aurita		KC789086				TR1948EK			Turkey?
Aurelia aurita		KC789087				TR1949EK			Turkey?
Aurelia aurita		KC789088				TR1946EK			Turkey?
Aurelia aurita		KC789089				TR1945EK			Turkey?
Aurelia aurita		KC789090				TR1943EK			Turkey?
Aurelia aurita		KC789091				TR1942EK			Turkey?
Aurelia aurita		KC789092				TR1941EK			Turkey?
Aurelia aurita		KC789093				TR1940EK			Turkey?
Aurelia aurita		KHA305-14					44.940200 N 67.002500 W	Bay of Fundy, New Brunswick	Canada
Aurelia aurita		KHA323-14					45.071400 N 67.054600 W	St. Andrews, New Brunswick	Canada
Aurelia aurita		KHA342-14					45.101900 N 67.052800 W	St. Andrews, New Brunswick	Canada
Aurelia aurita		KHA343-14					45.101900 N 67.052800 W	St. Andrews, New Brunswick	Canada
Aurelia aurita		KHA344-14					45.101900 N 67.052800 W	St. Andrews, New Brunswick	Canada
Aurelia aurita		KHA371-14					45.101900 N 67.052800 W	St. Andrews, New Brunswick	Canada
Aurelia aurita		KHA712-14					48.567700 N 53.956700 W	Bonavista Bay, Newfoundland and Labrador	Canada
Aurelia aurita		KHA713-14					48.567700 N 53.956700 W	Bonavista Bay, Newfoundland and Labrador	Canada
Aurelia aurita		KHA714-14					48.567700 N 53.956700 W	Bonavista Bay, Newfoundland and Labrador	Canada
Aurelia aurita		KHA715-14					48.567700 N 53.956700 W	Bonavista Bay, Newfoundland and Labrador	Canada
Aurelia aurita		KHA716-14					48.567700 N 53.956700 W	Bonavista Bay, Newfoundland and Labrador	Canada
Aurelia aurita		KHMS074-14					47.747700 N 64.708400 W	Shippagan, NewBrunswick	Canada
Aurelia aurita		KHMS075-14					47.747700 N 64.708400 W	Shippagan, NewBrunswick	Canada
Aurelia aurita		KHMS076-14					47.747700 N 64.708400 W	Shippagan, NewBrunswick	Canada
Aurelia aurita		KJ026272			M0D_008577W_UKHMHOR		50.8321 N 1.0829 W	Horsea Lake	United Kingdom
Aurelia aurita		KJ026273			M0D_008578X_UKHMHOR		50.8321 N 1.0829 W	Horsea Lake	United Kingdom
Aurelia aurita		KJ026274			M0D_008579Y_UKHMHOR		50.8321 N 1.0829 W	Horsea Lake	United Kingdom
Aurelia aurita		KJ026275			M0D_008580Z_UKHMHOR		50.8321 N 1.0829 W	Horsea Lake	United Kingdom
Aurelia aurita		KJ026276			M0D_008583C_UKHMHOR		50.8321 N 1.0829 W	Horsea Lake	United Kingdom
Aurelia aurita		KJ026277			M0D_008584D_UKHMHOR		50.8321 N 1.0829 W	Horsea Lake	United Kingdom
Aurelia aurita		KJ026278			M0D_008585E_UKHMHOR		50.8321 N 1.0829 W	Horsea Lake	United Kingdom
Aurelia aurita		KJ026279			M0D_008586F_UKHMHOR		50.8321 N 1.0829 W	Horsea Lake	United Kingdom
Aurelia aurita		KJ026280			M0D_008587G_UKHMHOR		50.8321 N 1.0829 W	Horsea Lake	United Kingdom
Aurelia aurita		KJ026281			M0D_008588H_UKHMHOR		50.8321 N 1.0829 W	Horsea Lake	United Kingdom
Aurelia aurita		KJ026282			M0D_008589I_UKHMHOR		50.8321 N 1.0829 W	Horsea Lake	United Kingdom
Aurelia aurita		KJ026283			M0D_008591K_UKHMHOR		50.8321 N 1.0829 W	Horsea Lake	United Kingdom
Aurelia aurita		KJ026284			M0D_008592L_UKHMHOR		50.8321 N 1.0829 W	Horsea Lake	United Kingdom
Aurelia aurita		KJ026285			M0D_008593M_UKHMHOR		50.8321 N 1.0829 W	Horsea Lake	United Kingdom
Aurelia aurita		KJ026286			M0D_008594N_UKHMHOR		50.8321 N 1.0829 W	Horsea Lake	United Kingdom
Aurelia aurita		KJ026287			M0D_008595O_UKHMHOR		50.8321 N 1.0829 W	Horsea Lake	United Kingdom
Aurelia aurita		KJ026288			M0D_008596P_UKHMHOR		50.8321 N 1.0829 W	Horsea Lake	United Kingdom
Aurelia aurita		KJ026289			M0D_008581A_UKHMHOR		50.8321 N 1.0829 W	Horsea Lake	United Kingdom
Aurelia aurita		KJ026290			M0D_008590J_UKHMHOR		50.8321 N 1.0829 W	Horsea Lake	United Kingdom
Aurelia aurita		KJ026291			M0D_008582B_UKHMHOR		50.8321 N 1.0829 W	Horsea Lake	United Kingdom
Aurelia aurita		KJ026292			M0D_009530N_UKIRSEA		53.7975 N 4.4848 W	Irish Sea	United Kingdom
Aurelia aurita		KJ026293			M0D_009531O_UKIRSEA		53.7975 N 4.4848 W	Irish Sea	United Kingdom
Aurelia aurita		KJ026294			M0D_009533Q_UKIRSEA		53.7975 N 4.4848 W	Irish Sea	United Kingdom
Aurelia aurita		KJ026295			M0D_009534R_UKIRSEA		53.7975 N 4.4848 W	Irish Sea	United Kingdom
Aurelia aurita		KJ026296			M0D_009535S_UKIRSEA		53.7975 N 4.4848 W	Irish Sea	United Kingdom
Aurelia aurita		KJ026297			M0D_009536T_UKIRSEA		53.7975 N 4.4848 W	Irish Sea	United Kingdom
Aurelia aurita		KJ026298			M0D_009537U_UKIRSEA		53.7975 N 4.4848 W	Irish Sea	United Kingdom
Aurelia aurita		KJ026299			M0D_009538V_UKIRSEA		53.7975 N 4.4848 W	Irish Sea	United Kingdom
Aurelia aurita		KJ026300			M0D_009539W_UKIRSEA		53.7975 N 4.4848 W	Irish Sea	United Kingdom
Aurelia aurita		KJ026301			M0D_009540X_UKIRSEA		53.7975 N 4.4848 W	Irish Sea	United Kingdom
Aurelia aurita		KJ026302			M0D_009541Y_UKIRSEA		53.7975 N 4.4848 W	Irish Sea	United Kingdom
Aurelia aurita		KJ026303			M0D_009542Z_UKIRSEA		53.7975 N 4.4848 W	Irish Sea	United Kingdom
Aurelia aurita		KJ026304			M0D_009543A_UKIRSEA		53.7975 N 4.4848 W	Irish Sea	United Kingdom
Aurelia aurita		KJ026305			M0D_009544B_UKIRSEA		53.7975 N 4.4848 W	Irish Sea	United Kingdom
Aurelia aurita		KJ026306			M0D_009545C_UKIRSEA		53.7975 N 4.4848 W	Irish Sea	United Kingdom
Aurelia aurita		KJ026307			M0D_009546D_UKIRSEA		53.7975 N 4.4848 W	Irish Sea	United Kingdom
Aurelia aurita		KJ026308			M0D_009547E_UKIRSEA		53.7975 N 4.4848 W	Irish Sea	United Kingdom
Aurelia aurita		KJ026309			M0D_009548F_UKIRSEA		53.7975 N 4.4848 W	Irish Sea	United Kingdom
Aurelia aurita		KJ026310			M0D_009549G_UKIRSEA		53.7975 N 4.4848 W	Irish Sea	United Kingdom
Aurelia aurita		KJ026311			M0D_009551I_UKIRSEA		53.7975 N 4.4848 W	Irish Sea	United Kingdom
Aurelia aurita		KJ026312			M0D_009552J_UKIRSEA		53.7975 N 4.4848 W	Irish Sea	United Kingdom
Aurelia aurita		KJ026313			M0D_009553K_UKIRSEA		53.7975 N 4.4848 W	Irish Sea	United Kingdom
Aurelia aurita		KJ026314			M0D_009550H_UKIRSEA		53.7975 N 4.4848 W	Irish Sea	United Kingdom
Aurelia aurita		KJ026315			M0D_009517A_UKIRSEA		53.7975 N 4.4848 W	Irish Sea	United Kingdom
Aurelia aurita		KJ026316			M0D_009518B_UKIRSEA		53.7975 N 4.4848 W	Irish Sea	United Kingdom
Aurelia aurita		KJ026317			M0D_009519C_UKIRSEA		53.7975 N 4.4848 W	Irish Sea	United Kingdom
Aurelia aurita		KJ026318			M0D_009520D_UKIRSEA		53.7975 N 4.4848 W	Irish Sea	United Kingdom
Aurelia aurita		KJ026319			M0D_009521E_UKIRSEA		53.7975 N 4.4848 W	Irish Sea	United Kingdom
Aurelia aurita		KJ026320			M0D_009522F_UKIRSEA		53.7975 N 4.4848 W	Irish Sea	United Kingdom
Aurelia aurita		KJ026321			M0D_009523G_UKIRSEA		53.7975 N 4.4848 W	Irish Sea	United Kingdom
Aurelia aurita		KJ026322			M0D_009524H_UKIRSEA		53.7975 N 4.4848 W	Irish Sea	United Kingdom
Aurelia aurita		KJ026323			M0D_009525I_UKIRSEA		53.7975 N 4.4848 W	Irish Sea	United Kingdom
Aurelia aurita		KJ026324			M0D_009526J_UKIRSEA		53.7975 N 4.4848 W	Irish Sea	United Kingdom
Aurelia aurita		KJ026325			M0D_009527K_UKIRSEA		53.7975 N 4.4848 W	Irish Sea	United Kingdom
Aurelia aurita		KJ026326			M0D_009528L_UKIRSEA		53.7975 N 4.4848 W	Irish Sea	United Kingdom
Aurelia aurita		KJ026327			M0D_009529M_UKIRSEA		53.7975 N 4.4848 W	Irish Sea	United Kingdom
Aurelia aurita		KJ026328			M0D_009554L_UKHMBRV		50.8175 N 1.4453 W	Beaulieu River	United Kingdom
Aurelia aurita		KJ026329			M0D_009555M_UKHMBRV		50.8175 N 1.4453 W	Beaulieu River	United Kingdom
Aurelia aurita		KJ026330			M0D_009556N_UKHMBRV		50.8175 N 1.4453 W	Beaulieu River	United Kingdom
Aurelia aurita		KJ026331			M0D_009557O_UKHMBRV		50.8175 N 1.4453 W	Beaulieu River	United Kingdom
Aurelia aurita		KJ026332			M0D_009558P_UKHMBRV		50.8175 N 1.4453 W	Beaulieu River	United Kingdom
Aurelia aurita		KJ026333			M0D_009559Q_UKHMBRV		50.8175 N 1.4453 W	Beaulieu River	United Kingdom
Aurelia aurita		KJ026334			M0D_009560R_UKHMBRV		50.8175 N 1.4453 W	Beaulieu River	United Kingdom
Aurelia aurita		KJ026335			M0D_009561S_UKHMBRV		50.8175 N 1.4453 W	Beaulieu River	United Kingdom
Aurelia aurita		KJ026336			M0D_024960Z_UKGBSTH		50.8429 N 1.3290 W	Southampton Water	United Kingdom
Aurelia aurita		KJ026337			M0D_024961A_UKGBSTH		50.8429 N 1.3290 W	Southampton Water	United Kingdom
Aurelia aurita		KJ026338			M0D_024962B_UKGBSTH		50.8429 N 1.3290 W	Southampton Water	United Kingdom
Aurelia aurita		KJ026339			M0D_024963C_UKGBSTH		50.8429 N 1.3290 W	Southampton Water	United Kingdom
Aurelia aurita		KJ026340			M0D_024964D_UKGBSTH		50.8429 N 1.3290 W	Southampton Water	United Kingdom
Aurelia aurita		KJ026341			M0D_024966F_UKGBSTH		50.8429 N 1.3290 W	Southampton Water	United Kingdom
Aurelia aurita		KJ026342			M0D_024967G_UKGBSTH		50.8429 N 1.3290 W	Southampton Water	United Kingdom
Aurelia aurita		KJ026343			M0D_024968H_UKGBSTH		50.8429 N 1.3290 W	Southampton Water	United Kingdom
Aurelia aurita		KJ026344			M0D_024969I_UKGBSTH		50.8429 N 1.3290 W	Southampton Water	United Kingdom
Aurelia aurita		KJ026345			M0D_024970J_UKGBSTH		50.8429 N 1.3290 W	Southampton Water	United Kingdom
Aurelia aurita		KJ026346			M0D_024971K_UKGBSTH		50.8429 N 1.3290 W	Southampton Water	United Kingdom
Aurelia aurita		KJ026347			M0D_024972L_UKGBSTH		50.8429 N 1.3290 W	Southampton Water	United Kingdom
Aurelia aurita		KJ026348			M0D_024973M_UKGBSTH		50.8429 N 1.3290 W	Southampton Water	United Kingdom
Aurelia aurita		KJ026349			M0D_024974N_UKGBSTH		50.8429 N 1.3290 W	Southampton Water	United Kingdom
Aurelia aurita		KJ026350			M0D_024976P_UKGBSTH		50.8429 N 1.3290 W	Southampton Water	United Kingdom
Aurelia aurita		KJ026351			M0D_024977Q_UKGBSTH		50.8429 N 1.3290 W	Southampton Water	United Kingdom
Aurelia aurita		KJ026352			M0D_024978R_UKGBSTH		50.8429 N 1.3290 W	Southampton Water	United Kingdom
Aurelia aurita		KJ026353			M0D_024979S_UKGBSTH		50.8429 N 1.3290 W	Southampton Water	United Kingdom
Aurelia aurita		KJ026354			M0D_024980T_UKGBSTH		50.8429 N 1.3290 W	Southampton Water	United Kingdom
Aurelia aurita		KJ026355			M0D_024975O_UKGBSTH		50.8429 N 1.3290 W	Southampton Water	United Kingdom
Aurelia aurita		KJ026356			M0D_024965E_UKGBSTH		50.8429 N 1.3290 W	Southampton Water	United Kingdom
Aurelia aurita		KP728284			AApolp01		51.3958 N 3.5704 E	Breskens, Western Scheldt	Netherlands
Aurelia aurita		KP728285			AApolp02		51.5923 N 3.719 E	Kamperland, Eastern Scheldt	Netherlands
Aurelia aurita		KP728286			AApolp03		51.7434 N 3.8796 E	Den Osse Kerkweg, Wadden Sea	Netherlands
Aurelia aurita		KP728287			AApolp04		51.7761 N 3.9464 E	Hompelvoet, Grevelingen	Netherlands
Aurelia aurita		KP728288			AApolp05		51.7317 N 3.9729 E	Bommenede, Grevelingen	Netherlands
Aurelia aurita		KP728289			AApolp06		53.4448 N 6.8246 E	Eemshaven, Wadden Sea	Netherlands
Aurelia aurita		KP728290			AApolp07		52.7662 N 4.2128 E	Vinca Gorthon, Broad Fourteens	Netherlands
Aurelia aurita		KP728291			AApolp08		54.7952 N 2.1482 E	Unknown wreck nr. 70502, Dogger Bank	United Kingdom
Aurelia aurita		KP728292			AApolp09		55.037 N 1.7027 E	Unknown wreck nr. 70500, Dogger Bank	United Kingdom
Aurelia aurita		KP728293			AApolp10		52.4713 N 3.7827 E	Unknown wreck, Broad Fourteens	Netherlands
Aurelia aurita		KP728294			AApolp11		53.3651 N 5.2216 E	Terschelling, Wadden Sea	Netherlands
Aurelia aurita		KP728295			AApolp12		53.3651 N 5.2216 E	Terschelling, Wadden Sea	Netherlands
Aurelia aurita		KP728296			AApolp13		53.0056 N 4.7964 E	NIOZ Jetty, Texel, Wadden Sea	Netherlands
Aurelia aurita		KP728297			AApolp14		53.0056 N 4.7964 E	NIOZ Jetty, Texel, Wadden Sea	Netherlands
Aurelia aurita		KP728298			AApolp15		58.2499 N 11.4465 E	Gullmar Fjord, Kristineberg	Sweden
Aurelia aurita		KP728299			AApolp16		53.2969 N 5.089 E	Vlieland, Wadden Sea	Netherlands
Aurelia aurita		KP728300			AApolp17		52.7662 N 4.2128 E	Vinca Gorthon, Broad Fourteens	Netherlands
Aurelia aurita		KP728301			AApolp18		51.3958 N 3.5704 E	Breskens, Western Scheldt	Netherlands
Aurelia aurita		KP728302			AApolp19		51.7761 N 3.9464 E	Hompelvoet, Grevelingen	Netherlands
Aurelia aurita		KP728303			AApolp20		52.9616 N 4.7804 E	Den Helder, Wadden Sea	Netherlands
Aurelia aurita		KP728304			AApolp21		51.3958 N 3.5704 E	Breskens, Western Scheldt	Netherlands
Aurelia aurita		KP728305			AApolp22		51.7761 N 3.9464 E	Hompelvoet, Grevelingen	Netherlands
Aurelia aurita		KP728306			AApolp23		51.7317 N 3.9729 E	Bommenede, Grevelingen	Netherlands
Aurelia aurita		KP728307			AApolp24		51.3958 N 3.5704 E	Breskens, Western Scheldt	Netherlands
Aurelia aurita		KP728308			AApolp25		51.7434 N 3.8796 E	Den Osse Kerkweg, Wadden Sea	Netherlands
Aurelia aurita		KP728309			AApolp26		51.7317 N 3.9729 E	Bommenede, Grevelingen	Netherlands
Aurelia aurita		KP728310			AApolp27		53.4448 N 6.8246 E	Eemshaven, Wadden Sea	Netherlands
Aurelia aurita		KP728311			AApolp28		53.0056 N 4.7964 E	NIOZ Jetty, Texel, Wadden Sea	Netherlands
Aurelia aurita		KP728312			AApolp29		53.3651 N 5.2216 E	Terschelling, Wadden Sea	Netherlands
Aurelia aurita		KP728313			AApolp30		54.4712 N 2.644 E	Ocean Prince Wreck, Dogger Bank	United Kingdom
Aurelia aurita		KP728314			AApolp31		54.7952 N 2.1482 E	Unknown wreck nr. 70502, Dogger Bank	United Kingdom
Aurelia aurita		KP728315			AApolp32		53.0056 N 4.7964 E	NIOZ Jetty, Texel, Wadden Sea	Netherlands
Aurelia aurita		KP728316			AApolp33		53.0056 N 4.7964 E	NIOZ Jetty, Texel, Wadden Sea	Netherlands
Aurelia aurita		KP728317			AApolp34		58.2499 N 11.4465 E	Gullmar Fjord, Kristineberg	Sweden
Aurelia aurita		KP728318			AApolp35		54.7952 N 2.1482 E	Unknown wreck nr. 70502, Dogger Bank	United Kingdom
Aurelia aurita		KP728319			AApolp36		55.037 N 1.7027 E	Unknown wreck nr. 70500, Dogger Bank	United Kingdom
Aurelia aurita		KP728320			AApolp37		54.8108 N 1.6898 E	Unknown wreck nr. 70501, Dogger Bank	United Kingdom
Aurelia aurita		KP728321			AApolp38		51.7317 N 3.9729 E	Bommenede, Grevelingen	Netherlands
Aurelia aurita		KP728322			AApolp39		52.7662 N 4.2128 E	Vinca Gorthon, Broad Fourteens	Netherlands
Aurelia aurita		KP728323			AApolp40		52.7662 N 4.2128 E	Vinca Gorthon, Broad Fourteens	Netherlands
Aurelia aurita		KP728324			AApolp41		58.2499 N 11.4465 E	Gullmar Fjord, Kristineberg	Sweden
Aurelia aurita		KP728325			AApolp42		52.7662 N 4.2128 E	Vinca Gorthon, Broad Fourteens	Netherlands
Aurelia aurita		KP728326			AApolp43		52.7662 N 4.2128 E	Vinca Gorthon, Broad Fourteens	Netherlands
Aurelia aurita		KP728327			AApolp44		53.3651 N 5.2216 E	Terschelling, Wadden Sea	Netherlands
Aurelia aurita		KP728328			AApolp45		51.6755 N 3.7553 E	Burghsluis, Eastern Scheldt	Netherlands
Aurelia aurita		KP728329			AApolp46		51.7761 N 3.9464 E	Hompelvoet, Grevelingen	Netherlands
Aurelia aurita		KP728330			AApolp47		52.9616 N 4.7804 E	Den Helder, Wadden Sea	Netherlands
Aurelia aurita		KP728331			AApolp48		53.3651 N 5.2216 E	Terschelling, Wadden Sea	Netherlands
Aurelia aurita		KP728332			AApolp49		51.3958 N 3.5704 E	Breskens, Western Scheldt	Netherlands
Aurelia aurita		KP728333			AApolp50		51.3958 N 3.5704 E	Breskens, Western Scheldt	Netherlands
Aurelia aurita		KP728334			AApolp51		51.3958 N 3.5704 E	Breskens, Western Scheldt	Netherlands
Aurelia aurita		KP728335			AApolp52		51.3958 N 3.5704 E	Breskens, Western Scheldt	Netherlands
Aurelia aurita		KP728336			AApolp53		51.3958 N 3.5704 E	Breskens, Western Scheldt	Netherlands
Aurelia aurita		KP728337			AApolp54		51.5923 N 3.719 E	Kamperland, Eastern Scheldt	Netherlands
Aurelia aurita		KP728338			AApolp55		51.5923 N 3.719 E	Kamperland, Eastern Scheldt	Netherlands
Aurelia aurita		KP728339			AApolp56		51.5923 N 3.719 E	Kamperland, Eastern Scheldt	Netherlands
Aurelia aurita		KP728340			AApolp57		51.6755 N 3.7553 E	Burghsluis, Eastern Scheldt	Netherlands
Aurelia aurita		KP728341			AApolp58		51.7761 N 3.9464 E	Hompelvoet, Grevelingen	Netherlands
Aurelia aurita		KP728342			AApolp59		53.4448 N 6.8246 E	Eemshaven, Wadden Sea	Netherlands
Aurelia aurita		KP728343			AApolp60		51.7761 N 3.9464 E	Hompelvoet, Grevelingen	Netherlands
Aurelia aurita		KP728344			AApolp61		51.7761 N 3.9464 E	Hompelvoet, Grevelingen	Netherlands
Aurelia aurita		KP728345			AApolp62		51.7761 N 3.9464 E	Hompelvoet, Grevelingen	Netherlands
Aurelia aurita		KP728346			AApolp63		51.7317 N 3.9729 E	Bommenede, Grevelingen	Netherlands
Aurelia aurita		KP728347			AApolp64		51.7317 N 3.9729 E	Bommenede, Grevelingen	Netherlands
Aurelia aurita		KP728348			AApolp65		51.7317 N 3.9729 E	Bommenede, Grevelingen	Netherlands
Aurelia aurita		KP728349			AApolp66		51.7317 N 3.9729 E	Bommenede, Grevelingen	Netherlands
Aurelia aurita		KP728350			AApolp67		54.7952 N 2.1482 E	Unknown wreck nr. 70502, Dogger Bank	United Kingdom
Aurelia aurita		KP728351			AApolp68		55.037 N 1.7027 E	Unknown wreck nr. 70500, Dogger Bank	United Kingdom
Aurelia aurita		KP728352			AApolp69		51.7317 N 3.9729 E	Bommenede, Grevelingen	Netherlands
Aurelia aurita		KP728353			AApolp70		52.9616 N 4.7804 E	Den Helder, Wadden Sea	Netherlands
Aurelia aurita		KP728354			AApolp71		52.9616 N 4.7804 E	Den Helder, Wadden Sea	Netherlands
Aurelia aurita		KP728355			AApolp72		52.9616 N 4.7804 E	Den Helder, Wadden Sea	Netherlands
Aurelia aurita		KP728356			AApolp73		53.4448 N 6.8246 E	Eemshaven, Wadden Sea	Netherlands
Aurelia aurita		KP728357			AApolp74		52.7662 N 4.2128 E	Vinca Gorthon, Broad Fourteens	Netherlands
Aurelia aurita		KP728358			AApolp75		54.5035 N 2.8293 E	Unknown wreck nr. 59695, Dogger Bank	United Kingdom
Aurelia aurita		KP728359			AApolp76		54.4712 N 2.644 E	Ocean Prince Wreck, Dogger Bank	United Kingdom
Aurelia aurita		KP728360			AApolp77		53.2969 N 5.089 E	Vlieland, Wadden Sea	Netherlands
Aurelia aurita		KP728361			AApolp78		53.2969 N 5.089 E	Vlieland, Wadden Sea	Netherlands
Aurelia aurita		KP728362			AApolp79		53.2969 N 5.089 E	Vlieland, Wadden Sea	Netherlands
Aurelia aurita		KP728363			AApolp80		53.2969 N 5.089 E	Vlieland, Wadden Sea	Netherlands
Aurelia aurita		KP728364			AApolp81		53.3651 N 5.2216 E	Terschelling, Wadden Sea	Netherlands
Aurelia aurita		KP728365			AApolp82		53.3651 N 5.2216 E	Terschelling, Wadden Sea	Netherlands
Aurelia aurita		KP728366			AApolp83		53.0056 N 4.7964 E	NIOZ Jetty, Texel, Wadden Sea	Netherlands
Aurelia aurita		KP728367			AApolp84		53.0056 N 4.7964 E	NIOZ Jetty, Texel, Wadden Sea	Netherlands
Aurelia aurita		KP728368			AApolp85		53.0056 N 4.7964 E	NIOZ Jetty, Texel, Wadden Sea	Netherlands
Aurelia aurita		KP728369			AApolp86		53.0718 3.2326	Russian Submarine Wreck, Broad Fourteens	Netherlands
Aurelia aurita		KP728370			AApolp87		58.2499 N 11.4465 E	Gullmar Fjord, Kristineberg	Sweden
Aurelia aurita		KP728371			AApolp88		58.2499 N 11.4465 E	Gullmar Fjord, Kristineberg	Sweden
Aurelia aurita		KP728372			AApolp89		58.2499 N 11.4465 E	Gullmar Fjord, Kristineberg	Sweden
Aurelia aurita		KP728373			AAmedu01		53.0056 N 4.7964 E	Marsdiep (t Horntje), Wadden Sea	Netherlands
Aurelia aurita		KP728374			AAmedu02		53.0056 N 4.7964 E	Marsdiep (t Horntje), Wadden Sea	Netherlands
Aurelia aurita		KP728375			AAmedu03		53.0056 N 4.7964 E	Marsdiep (t Horntje), Wadden Sea	Netherlands
Aurelia aurita		MG935022				Scyphozoa 66V	57.649000 N 11.752000 E	Kattegatt	Sweden
Aurelia ayla sp. nov.	MZ061766	MZ052161			AGC62	USNM1622161	12.2 N 68.308611 W	Oil slick leap, Kralendijk	Bonaire, the Netherlands
Aurelia ayla sp. nov.	MZ061767				AGC70	USNM1622169	12.2 N 68.308611 W	Oil slick leap, Kralendijk	Bonaire, the Netherlands
Aurelia cebimarensis sp. nov.				EU272547		AGC170
Aurelia cebimarensis sp. nov.				HM194874	M0D15616D		25.0680 S 47.8980 W	Cananeia, São Paulo	Brazil
Aurelia cebimarensis sp. nov.	MZ061777	MZ052171		MZ061827	JL5		23.713 S 45.336 W	Ilhabela, São Paulo	Brazil
Aurelia cebimarensis sp. nov.	MZ061778	MZ052172		MZ061828	JL6		23.713 S 45.336 W	Ilhabela, São Paulo	Brazil
Aurelia cebimarensis sp. nov.	MZ061783	MZ052176		MZ061831	JL11		23.813 S 45.391 W	Canal de São Sebastião, São Paulo	Brazil
Aurelia cebimarensis sp. nov.	MZ061788	MZ052181		MZ061835	JL16	MZUSP8645	23.828 S 45.422 W	CEBIMar, São Sebastião, São Paulo	Brazil
Aurelia cebimarensis sp. nov.	MZ061812	MZ052201		MZ061856	JL41		10.9918 S 37.0445 W	Praia de Atalaia, Aracaju, Sergipe	Brazil
Aurelia cebimarensis sp. nov.			AY319850		Brazil9		25.0680 S 47.8980 W	Cananeia, São Paulo	Brazil
Aurelia cebimarensis sp. nov.			AY319851		Brazil		25.0680 S 47.8980 W	Cananeia, São Paulo	Brazil
Aurelia cebimarensis sp. nov.	KY610676				M0D014616D_BRSPCAN		25.0680 S 47.8980 W	Cananeia, São Paulo	Brazil
Aurelia cebimarensis sp. nov.	MZ061779				JL7		23.713 S 45.336 W	Ilhabela, São Paulo	Brazil
Aurelia cebimarensis sp. nov.	MZ061782	MZ052175			JL10		23.813 S 45.540 W	Toque-Toque, São Paulo	Brazil
Aurelia cebimarensis sp. nov.	MZ061784	MZ052177			JL12		23.713 S 45.336 W	Ilhabela, São Paulo	Brazil
Aurelia cebimarensis sp. nov.		AY903119			Morandini9		25.0680 S 47.8980 W	Cananeia, São Paulo	Brazil
Aurelia cebimarensis sp. nov.		AY903120			Morandini10		25.0680 S 47.8980 W	Cananeia, São Paulo	Brazil
Aurelia cebimarensis sp. nov.		AY903121			Morandini11		25.0680 S 47.8980 W	Cananeia, São Paulo	Brazil
Aurelia cebimarensis sp. nov.		AY903122			Morandini12		25.0680 S 47.8980 W	Cananeia, São Paulo	Brazil
Aurelia cf. coerulea		KP033138			AS2		11.5129 N 79.7788 E	Parangipettai	India
Aurelia cf. columbia			AF461408		EPLAB1		48.541 N 123.001 W	Friday Harbor	Washington
Aurelia cf. columbia	AF461401						47.844293 N 124.908201 W	Washington	USA
Aurelia cf. columbia	JX393255				OP		48.413 N 123.384 W	Ogden Point, Victoria	Canada
Aurelia cf. dubia	KP144282						29.512 N 34.947 E	Eilat, Red Sea	Israel
Aurelia cf. labiata			AY319842		Monterey		36.799 N 121.945 W	Monterey Bay, California	USA
Aurelia cf. labiata			AY935202		Alaska4		59.633 N 151.4500 W	Kachemak Bay, Alaska	USA
Aurelia cf. labiata	JX393253				B		48.838 N 125.150 W	Bamfield	Canada
Aurelia cf. malayensis		AY903111			BJLK5		7.3166 N 134.5166 E	Uet era Ngermeuangel, Ngermeuangel, Koror State	Palau
Aurelia clausa			AY319839		Helen5		2.8830 N 131.7210 E	Helen Reef, Hatohobei State	Palau
Aurelia clausa			AY935207		HelenReef#5-2		2.8830 N 131.7210 E	Helen Reef, Hatohobei State	Palau
Aurelia clausa		AY903099			NgellChannel45		7.3000 N 134.4666 E	Ngell Channel, Malakal Harbor, Koror State	Palau
Aurelia clausa		AY903100			NgellChannel46		7.3000 N 134.4666 E	Ngell Channel, Malakal Harbor, Koror State	Palau
Aurelia clausa		AY903103			HelenReef1		2.8830 N 131.7210 E	Helen Reef, Hatohobei State	Palau
Aurelia clausa		AY903104			HelenReef4		2.8830 N 131.7210 E	Helen Reef, Hatohobei State	Palau
Aurelia clausa		AY903105			HelenReef5		2.8830 N 131.7210 E	Helen Reef, Hatohobei State	Palau
Aurelia clausa		AY903106			HelenReef6		2.8830 N 131.7210 E	Helen Reef, Hatohobei State	Palau
Aurelia clausa		AY903129			NewBritain2		5.417800 S 150.701357 E	New Britain	Papua New Guinea
Aurelia clausa		MF742079			IDPAJGB	M0D007138N	0.499 N 130.571222 E	Jelly Bay, Gam, Papua	Indonesia
Aurelia clausa		MF742080			IDPAJGB	M0D007139O	0.499 N 130.571222 E	Jelly Bay, Gam, Papua	Indonesia
Aurelia clausa		MF742081			IDPAJGB	M0D007140P	0.499 N 130.571222 E	Jelly Bay, Gam, Papua	Indonesia
Aurelia clausa		MF742082			IDPAJGB	M0D007141Q	0.499 N 130.571222 E	Jelly Bay, Gam, Papua	Indonesia
Aurelia clausa		MF742083			IDPAJGB	M0D007142R	0.499 N 130.571222 E	Jelly Bay, Gam, Papua	Indonesia
Aurelia clausa		MF742084			IDPAJGB	M0D007143S	0.499 N 130.571222 E	Jelly Bay, Gam, Papua	Indonesia
Aurelia clausa		MF742114			PWKOFNF	M0D009203Y	7.338133 N 134.467431 E	Fish'n Fins, Koror State	Palau
Aurelia clausa		MF742115			PWKOFNF	M0D009204Z	7.338133 N 134.467431 E	Fish'n Fins, Koror State	Palau
Aurelia clausa		MF742116			PWKOFNF	M0D009205A	7.338133 N 134.467431 E	Fish'n Fins, Koror State	Palau
Aurelia clausa		MF742117			PWKOFNF	M0D009206B	7.338133 N 134.467431 E	Fish'n Fins, Koror State	Palau
Aurelia clausa		MF742118			PWKOFNF	M0D009207C	7.338133 N 134.467431 E	Fish'n Fins, Koror State	Palau
Aurelia clausa		MF742119			PWKOFNF	M0D009208D	7.338133 N 134.467431 E	Fish'n Fins, Koror State	Palau
Aurelia coerulea		EU010386	EU276014	EU276014	Incheon-2006		37.466 N 126.578 E	Incheon	South Korea
Aurelia coerulea		KX691552		KX691615	NSAM00011Q_Varano		41.8822 N 15.7399 E	Varano Lagoon	Italy
Aurelia coerulea		KX691553		KX691616	NSAM00011R_Varano		41.8822 N 15.7399 E	Varano Lagoon	Italy
Aurelia coerulea		KX691555		KX691617	NSAM00011T_Varano		41.8822 N 15.7399 E	Varano Lagoon	Italy
Aurelia coerulea		KX691556		KX691618	NSAM00011U_Varano		41.8822 N 15.7399 E	Varano Lagoon	Italy
Aurelia coerulea		KX691557		KX691619	NSAM00011V_Varano		41.8822 N 15.7399 E	Varano Lagoon	Italy
Aurelia coerulea		KX691558		KX691620	NSAM00011W_Varano		41.8822 N 15.7399 E	Varano Lagoon	Italy
Aurelia coerulea		KX691559		KX691621	NSAM00011X_Varano		41.8822 N 15.7399 E	Varano Lagoon	Italy
Aurelia coerulea		KX691560		KX691622	NSAM00011Y_Varano		41.8822 N 15.7399 E	Varano Lagoon	Italy
Aurelia coerulea		KX691585		KX691641	NSAM00033U_Empuriabrava		42.2466 N 3.1351 E	Empuriabrava, Catalunya	Spain
Aurelia coerulea		KX691586		KX691642	NSAM00033W_Empuriabrava		42.2466 N 3.1351 E	Empuriabrava, Catalunya	Spain
Aurelia coerulea		KX691587		KX691643	NSAM00033X_Empuriabrava		42.2466 N 3.1351 E	Empuriabrava, Catalunya	Spain
Aurelia coerulea		KX691588		KX691644	NSAM00033Y_Empuriabrava		42.2466 N 3.1351 E	Empuriabrava, Catalunya	Spain
Aurelia coerulea		KX691590		KX691645	NSAM00034A_Empuriabrava		42.2466 N 3.1351 E	Empuriabrava, Catalunya	Spain
Aurelia coerulea		KX691591		KX691646	NSAM00034D_Empuriabrava		42.2466 N 3.1351 E	Empuriabrava, Catalunya	Spain
Aurelia coerulea		KX691592		KX691647	NSAM00034E_Empuriabrava		42.2466 N 3.1351 E	Empuriabrava, Catalunya	Spain
Aurelia coerulea		KX691597		KX691648	NSAM00034J_Empuriabrava		42.2466 N 3.1351 E	Empuriabrava, Catalunya	Spain
Aurelia coerulea	MZ061790	MZ052183		MZ061837	JL18			Monterey Bay Aquarium, California	USA
Aurelia coerulea	MZ061791	MZ052184		MZ061838	JL19		33.68 N 135.32 E	Shirahama	Japan
Aurelia coerulea	MZ061794	MZ052187		MZ061841	JL22		48.728 N 3.983 W	Roscoff	France
Aurelia coerulea	MZ061795	MZ052188		MZ061842	JL23		33.68 N 135.32 E	Shirahama	Japan
Aurelia coerulea	MZ061796	MZ052189		MZ061843	JL24		31.360 N 130.680 E	Kagoshima Bay	Japan
Aurelia coerulea	MZ061798	MZ052191		MZ061845	JL26		54.126825 N 8.835968 E	near Büsum, North Sea	Germany
Aurelia coerulea	MZ061799	MZ052192		MZ061846	JL27		42.49 N 144.17 E	Hokkaido	Japan
Aurelia coerulea	MZ061800	MZ052193		MZ061847	JL28		35.211 N 139.405 E	Sagami Bay	Japan
Aurelia coerulea	MZ061810	MZ052200		MZ061855	JL39		42.2466 N 3.1351 E	Empuriabrava, Catalunya	Spain
Aurelia coerulea			AB377597		MIZT1		35.11 N 142.92 E	Pacific Ocean	Japan
Aurelia coerulea			AF461405		EAROS		48.728 N 3.983 W	Roscoff	France
Aurelia coerulea			AY935214		#1 MiyazuBay		35.542 N 135.194 E	Miyazu Bay, Honshu	Japan
Aurelia coerulea		EU366143	EU332744			Busan-2007	35.2161 N 129.2280 E	Busan	South Korea
Aurelia coerulea		EU366144	EU332745			Geoje-do-2006	34.9925 N 128.6752 E	Geoje-do	South Korea
Aurelia coerulea			KC767900		Roscoff		48.728 N 3.983 W	Roscoff	France
Aurelia coerulea			KR338968		Yellow Sea-2009		38.766 N 121.500 E	Dalian, Liaoning	China
Aurelia coerulea			LC081234		KH1A		34.125 N 132.552 E	Kurahashi Island, Seto Inland Sea	Japan
Aurelia coerulea	MH059723	MH206614	MH059572		SPJ3		40.757832 N 29.905311 E	Seka Park, Marmara Sea	Turkey
Aurelia coerulea	MH064432	MH206613	MH062754		SPJ5		40.757832 N 29.905311 E	Seka Park, Marmara Sea	Turkey
Aurelia coerulea	AB720913				gfKAMOaq			Kamo Aquarium	Japan
Aurelia coerulea	AF461398
Aurelia coerulea	JX393252				K			Kamo Aquarium	Japan
Aurelia coerulea	JX845344	JX845349				OUC-HABs MBL-03	36.1544 N 120.3305 E	Jiaozhou Bay	China
Aurelia coerulea	KF962395	KF962060				XMAS1	24.470 N 118.223 E	Xiamen Bay	China
Aurelia coerulea	KF962396	KF962061				XMAS2	24.470 N 118.223 E	Xiamen Bay	China
Aurelia coerulea	KF962397	KF962062				XMAS3	24.470 N 118.223 E	Xiamen Bay	China
Aurelia coerulea	KF962398	KF962063				XMAS4	24.470 N 118.223 E	Xiamen Bay	China
Aurelia coerulea	KF962399	KF962064				XMAS5	24.470 N 118.223 E	Xiamen Bay	China
Aurelia coerulea	KF962400	KF962065				XMAS6	24.470 N 118.223 E	Xiamen Bay	China
Aurelia coerulea	KJ733908	KJ733900				XMAuS1	24.470 N 118.223 E	Xiamen Bay	China
Aurelia coerulea	KJ733909					XMAuS4	24.470 N 118.223 E	Xiamen Bay	China
Aurelia coerulea	KJ733910					XMAuS5	24.470 N 118.223 E	Xiamen Bay	China
Aurelia coerulea	KJ733911	KJ733901				XMAuS2	24.470 N 118.223 E	Xiamen Bay	China
Aurelia coerulea	KJ733912	KJ733902				XMAuS3	24.470 N 118.223 E	Xiamen Bay	China
Aurelia coerulea	KX827340				RC01		36.923333 N 122.511667 E	Shidao, Shandong Province	China
Aurelia coerulea	KX827341				RC02		36.923333 N 122.511667 E	Shidao, Shandong Province	China
Aurelia coerulea	KX827342				RC03		36.923333 N 122.511667 E	Shidao, Shandong Province	China
Aurelia coerulea	MF981165				MCFD04		36.923333 N 122.511667 E	Shidao, Shandong Province	China
Aurelia coerulea	MF981166				MCFD18		36.923333 N 122.511667 E	Shidao, Shandong Province	China
Aurelia coerulea	MF981167				MCFD21		36.923333 N 122.511667 E	Shidao, Shandong Province	China
Aurelia coerulea	MF981168				MCFD05		36.923333 N 122.511667 E	Shidao, Shandong Province	China
Aurelia coerulea	MF981169				MCFD20		36.923333 N 122.511667 E	Shidao, Shandong Province	China
Aurelia coerulea	MF981170				MCFD26		36.923333 N 122.511667 E	Shidao, Shandong Province	China
Aurelia coerulea	MF981171				MCFD25		36.923333 N 122.511667 E	Shidao, Shandong Province	China
Aurelia coerulea	MF981172				MCFD16		36.923333 N 122.511667 E	Shidao, Shandong Province	China
Aurelia coerulea	MF981173				EDY19		36.923333 N 122.511667 E	Shidao, Shandong Province	China
Aurelia coerulea	MF981174				ELT42		36.923333 N 122.511667 E	Shidao, Shandong Province	China
Aurelia coerulea	MF981175				ELT46		36.923333 N 122.511667 E	Shidao, Shandong Province	China
Aurelia coerulea	MF981176				ERC08		36.923333 N 122.511667 E	Shidao, Shandong Province	China
Aurelia coerulea	MF981177				MRC17		36.923333 N 122.511667 E	Shidao, Shandong Province	China
Aurelia coerulea	MF981178				MRC23		36.923333 N 122.511667 E	Shidao, Shandong Province	China
Aurelia coerulea	MF981179				MRC28		36.923333 N 122.511667 E	Shidao, Shandong Province	China
Aurelia coerulea	MF981180				MQD21		36.923333 N 122.511667 E	Shidao, Shandong Province	China
Aurelia coerulea	MF981181				MWF02		36.923333 N 122.511667 E	Shidao, Shandong Province	China
Aurelia coerulea	MZ061768	MZ052162			DP2			Discovery Place Aquarium, North Carolina	USA
Aurelia coerulea	MZ061769	MZ052163			DP3			Discovery Place Aquarium, North Carolina	USA
Aurelia coerulea	MZ061815	MZ052203			JLA1			National Aquarium, Maryland	USA
Aurelia coerulea	MZ061816	MZ052204			JLA2			National Aquarium, Maryland	USA
Aurelia coerulea		AY903078			MarinaDelRey2		33.9662 N 118.4514 E	Marina del Rey, Los Angeles, California	USA
Aurelia coerulea		AY903079			MarinaDelRey3		33.9662 N 118.4514 E	Marina del Rey, Los Angeles, California	USA
Aurelia coerulea		AY903080			MarinaDelRey4		33.9662 N 118.4514 E	Marina del Rey, Los Angeles, California	USA
Aurelia coerulea		AY903081			MarinaDelRey5		33.9662 N 118.4514 E	Marina del Rey, Los Angeles, California	USA
Aurelia coerulea		AY903082			LongBeach_2		33.7549 N 118.1500 W	Long Beach, Los Angeles, California	USA
Aurelia coerulea		AY903083			LongBeach_3		33.7549 N 118.1500 W	Long Beach, Los Angeles, California	USA
Aurelia coerulea		AY903084			LongBeach_4		33.7549 N 118.1500 W	Long Beach, Los Angeles, California	USA
Aurelia coerulea		AY903085			LongBeach_5		33.7549 N 118.1500 W	Long Beach, Los Angeles, California	USA
Aurelia coerulea		AY903086			NewportBeach1		33.602 N 117.926 W	Newport Beach, California	USA
Aurelia coerulea		AY903087			NewportBeach3		33.602 N 117.926 W	Newport Beach, California	USA
Aurelia coerulea		AY903088			NewportBeach4		33.602 N 117.926 W	Newport Beach, California	USA
Aurelia coerulea		AY903089			SanDiego1		32.7178 N 117.1840 W	San Diego, Los Angeles, California	USA
Aurelia coerulea		AY903090			SanDiego2		32.7178 N 117.1840 W	San Diego, Los Angeles, California	USA
Aurelia coerulea		AY903091			SanDiego3		32.7178 N 117.1840 W	San Diego, Los Angeles, California	USA
Aurelia coerulea		AY903092			SanDiego4		32.7178 N 117.1840 W	San Diego, Los Angeles, California	USA
Aurelia coerulea		AY903116			TokyoBay		35.1225 N 139.8160 W	Tokyo Bay, Tokyo, Honshu	Japan
Aurelia coerulea		AY903126			Perth1a		32.0132 S 115.7301 E	Perth, Western Australia	Australia
Aurelia coerulea		AY903127			Perth2		32.0132 S 115.7301 E	Perth, Western Australia	Australia
Aurelia coerulea		AY903128			Mooloolaba1		26.6839 S 153.1338 E	Moololaba, Queensland	Australia
Aurelia coerulea		AY903130			Sydney_1		33.8547 S 151.2032 E	Millers Pt, Sydney, New South Wales	Australia
Aurelia coerulea		AY903131			Sydney_2		33.8547 S 151.2032 E	Millers Pt, Sydney, New South Wales	Australia
Aurelia coerulea		AY903142			Port_Hacking_3		34.0711 S 151.1247 E	Port Hacking, New South Wales	Australia
Aurelia coerulea		AY903143			Darling_Harbour_1		33.8698 S 151.1999 E	Darling Harbour, Sydney, New South Wales	Australia
Aurelia coerulea		AY903146			Coila_Lake_1		36.0164 S 150.1175 E	Coila Lake, New South Wales	Australia
Aurelia coerulea		AY903147			Coila_Lake_3		36.0164 S 150.1175 E	Coila Lake, New South Wales	Australia
Aurelia coerulea		AY903148			Coila_Lake_4		36.0164 S 150.1175 E	Coila Lake, New South Wales	Australia
Aurelia coerulea		AY903149			Coila_Lake_5		36.0164 S 150.1175 E	Coila Lake, New South Wales	Australia
Aurelia coerulea		AY903150			Coila_Lake_6		36.0164 S 150.1175 E	Coila Lake, New South Wales	Australia
Aurelia coerulea		AY903151			Huon_Estuary_5		43.200 S 147.000 E	Tasmania, Huon Estuary	Australia
Aurelia coerulea		AY903152			Lake_Illawarra_1		34.5166 S 150.8333 E	Lake Illawarra, New South Wales	Australia
Aurelia coerulea		AY903153			Lake_Illawarra_5		34.5166 S 150.8333 E	Lake Illawarra, New South Wales	Australia
Aurelia coerulea		AY903154			Lake_Illawarra_6		34.5166 S 150.8333 E	Lake Illawarra, New South Wales	Australia
Aurelia coerulea		AY903155			Tuggerah_Lake_1		33.3109 S 151.4910 E	Tuggerah Lake, New South Wales	Australia
Aurelia coerulea		AY903156			Tuggerah_Lake_2		33.3109 S 151.4910 E	Tuggerah Lake, New South Wales	Australia
Aurelia coerulea		AY903157			Tuggerah_Lake_3		33.3109 S 151.4910 E	Tuggerah Lake, New South Wales	Australia
Aurelia coerulea		AY903158			Tuggerah_Lake_4		33.3109 S 151.4910 E	Tuggerah Lake, New South Wales	Australia
Aurelia coerulea		AY903159			Tuggerah_Lake_5		33.3109 S 151.4910 E	Tuggerah Lake, New South Wales	Australia
Aurelia coerulea		AY903160			Tuggerah_Lake_6		33.3109 S 151.4910 E	Tuggerah Lake, New South Wales	Australia
Aurelia coerulea		AY903161			Lake_Macquarie_1		33.0975 S 151.5799 E	Lake Macquarie, New South Wales	Australia
Aurelia coerulea		AY903162			Lake_Macquarie_2		33.0975 S 151.5799 E	Lake Macquarie, New South Wales	Australia
Aurelia coerulea		AY903163			Lake_Macquarie_3		33.0975 S 151.5799 E	Lake Macquarie, New South Wales	Australia
Aurelia coerulea		AY903164			Lake_Macquarie_4		33.0975 S 151.5799 E	Lake Macquarie, New South Wales	Australia
Aurelia coerulea		AY903165			Lake_Macquarie_5		33.0975 S 151.5799 E	Lake Macquarie, New South Wales	Australia
Aurelia coerulea		AY903166			Lake_Macquarie_6		33.0975 S 151.5799 E	Lake Macquarie, New South Wales	Australia
Aurelia coerulea		AY903167			Mooloolaba_3		26.6839 S 153.1338 E	Moololaba, Queensland	Australia
Aurelia coerulea		AY903168			Miyazu1		35.542 N 135.194 E	Miyazu Bay, Honshu	Japan
Aurelia coerulea		AY903169			Miyazu2		35.542 N 135.194 E	Miyazu Bay, Honshu	Japan
Aurelia coerulea		AY903170			Miyazu3		35.542 N 135.194 E	Miyazu Bay, Honshu	Japan
Aurelia coerulea		AY903171			Miyazu5		35.542 N 135.194 E	Miyazu Bay, Honshu	Japan
Aurelia coerulea		AY903177			Perth_3		32.0132 S 115.7301 E	Perth, Western Australia	Australia
Aurelia coerulea		AY903178			Perth_5		32.0132 S 115.7301 E	Perth, Western Australia	Australia
Aurelia coerulea		AY903179			Perth_6		32.0132 S 115.7301 E	Perth, Western Australia	Australia
Aurelia coerulea		AY903180			Perth_7		32.0132 S 115.7301 E	Perth, Western Australia	Australia
Aurelia coerulea		AY903181			Sydney_3		33.8464 S 151.2490 E	Port Jackson, Sydney, New South Wales	Australia
Aurelia coerulea		AY903182			Sydney_4		33.8464 S 151.2490 E	Port Jackson, Sydney, New South Wales	Australia
Aurelia coerulea		AY903183			Sydney_5		33.8464 S 151.2490 E	Port Jackson, Sydney, New South Wales	Australia
Aurelia coerulea		AY903184			Sydney_6		33.8464 S 151.2490 E	Port Jackson, Sydney, New South Wales	Australia
Aurelia coerulea		AY903185			Newport_Beach_5		33.602 N 117.926 W	Newport Beach, California	USA
Aurelia coerulea		AY903186			Sakata Bay 1		38.9333 N 139.8000 E	Sakata Bay, Honshu	Japan
Aurelia coerulea		AY903187			Sakata Bay 3		38.9333 N 139.8000 E	Sakata Bay, Honshu	Japan
Aurelia coerulea		AY903188			Sakata Bay 4		38.9333 N 139.8000 E	Sakata Bay, Honshu	Japan
Aurelia coerulea		AY903190			Uwa1		33.2210 N 132.5553 E	Uwa Bay, Inland Sea	Japan
Aurelia coerulea		AY903191			Uwa4		33.2210 N 132.5553 E	Uwa Bay, Inland Sea	Japan
Aurelia coerulea		AY903192			Uwa6		33.2210 N 132.5553 E	Uwa Bay, Inland Sea	Japan
Aurelia coerulea		AY903193			Uwa7		33.2210 N 132.5553 E	Uwa Bay, Inland Sea	Japan
Aurelia coerulea		AY903194			Ondo1		34.2003 N 132.5387 E	Ondo Strait, Inland Sea	Japan
Aurelia coerulea		AY903195			Ondo2		34.2003 N 132.5387 E	Ondo Strait, Inland Sea	Japan
Aurelia coerulea		AY903196			Ondo3		34.2003 N 132.5387 E	Ondo Strait, Inland Sea	Japan
Aurelia coerulea		AY903197			Ondo4		34.2003 N 132.5387 E	Ondo Strait, Inland Sea	Japan
Aurelia coerulea		AY903198			Ondo5		34.2003 N 132.5387 E	Ondo Strait, Inland Sea	Japan
Aurelia coerulea		AY903199			Ondo6		34.2003 N 132.5387 E	Ondo Strait, Inland Sea	Japan
Aurelia coerulea		AY903200			Ondo7		34.2003 N 132.5387 E	Ondo Strait, Inland Sea	Japan
Aurelia coerulea		AY903201			Ondo8		34.2003 N 132.5387 E	Ondo Strait, Inland Sea	Japan
Aurelia coerulea		AY903202			Ondo9		34.2003 N 132.5387 E	Ondo Strait, Inland Sea	Japan
Aurelia coerulea		AY903203			TokyoBay01		35.1225 N 139.8160 W	Tokyo Bay, Tokyo, Honshu	Japan
Aurelia coerulea		AY903204			TokyoBay02		35.1225 N 139.8160 W	Tokyo Bay, Tokyo, Honshu	Japan
Aurelia coerulea		AY903205			TokyoBay03		35.1225 N 139.8160 W	Tokyo Bay, Tokyo, Honshu	Japan
Aurelia coerulea		AY903206			TokyoBay04		35.1225 N 139.8160 W	Tokyo Bay, Tokyo, Honshu	Japan
Aurelia coerulea		AY903207			TokyoBay07		35.1225 N 139.8160 W	Tokyo Bay, Tokyo, Honshu	Japan
Aurelia coerulea		CNIDC033-14					33.611800 N 117.922000 W	Lido Isle, Newport Beach, California	USA
Aurelia coerulea		CNIDC037-14					33.624100 N 117.893000 W	Off Newport Aquatic Center, Newport Beach, California	USA
Aurelia coerulea		CNIDC132-15					33.611800 N 117.922000 W	Lido Isle, Newport Beach, California	USA
Aurelia coerulea		CNIDC143-15					33.611800 N 117.922000 W	Lido Isle, Newport Beach, California	USA
Aurelia coerulea		CNIDC144-15					33.611800 N 117.922000 W	Lido Isle, Newport Beach, California	USA
Aurelia coerulea		CNIDC145-15					33.611800 N 117.922000 W	Lido Isle, Newport Beach, California	USA
Aurelia coerulea		CNIDC155-15					33.624100 N 117.893000 W	Off Newport Aquatic Center, Newport Beach, California	USA
Aurelia coerulea		CNIDC160-15					33.611800 N 117.922000 W	Lido Isle, Newport Beach, California	USA
Aurelia coerulea		CNIDC161-15					33.611800 N 117.922000 W	Lido Isle, Newport Beach, California	USA
Aurelia coerulea		CNIDC162-15					33.611800 N 117.922000 W	Lido Isle, Newport Beach, California	USA
Aurelia coerulea		CNIDC171-15						Cabrillo Marine Aquarium, California	USA
Aurelia coerulea		CNIDC172-15					33.624100 N 117.893000 W	Off Newport Aquatic Center, Newport Beach, California	USA
Aurelia coerulea		CNIDC199-15						Cabrillo Marine Aquarium, California	USA
Aurelia coerulea		CNIDC200-15						Cabrillo Marine Aquarium, California	USA
Aurelia coerulea		CNIDC201-15						Cabrillo Marine Aquarium, California	USA
Aurelia coerulea		CNIDC329-16					33.611800 N 117.922000 W	Lido Isle, Newport Beach, California	USA
Aurelia coerulea		CNIDC352-16					33.611800 N 117.922000 W	Lido Isle, Newport Beach, California	USA
Aurelia coerulea		EF010537			Yeosu		34.722 N 127.661 E	Yeosu	South Korea
Aurelia coerulea		HM053519				IOCAS:36005	36.1544 N 120.3305 E	Jiaozhou Bay	China
Aurelia coerulea		JQ353726			hy2		38.9382 N 121.7480 E	Dalian	China
Aurelia coerulea		JQ353727			hy1_6		36.1544 N 120.3305 E	Jiaozhou Bay	China
Aurelia coerulea		JQ353728			hy_1		36.1544 N 120.3305 E	Jiaozhou Bay	China
Aurelia coerulea		KHBC175-13						Vancouver Aquarium, British Columbia	Canada
Aurelia coerulea		KP692768				JCFD01	39.106 N 118.506 E	Caofeidian, Bohai Sea	China
Aurelia coerulea		KP692769				JRZ15	35.409 N 119.562 E	Rizhao, Yellow Sea	China
Aurelia coerulea		KP692770				JWF07	37.221 N 119.182 E	Weifang, Bohai Sea	China
Aurelia coerulea		KP692771				JCFD18	39.106 N 118.506 E	Caofeidian, Bohai Sea	China
Aurelia coerulea		KP692772				JCFD24	39.106 N 118.506 E	Caofeidian, Bohai Sea	China
Aurelia coerulea		KP692773				JCFD25	39.106 N 118.506 E	Caofeidian, Bohai Sea	China
Aurelia coerulea		KP692774				JCFD28	39.106 N 118.506 E	Caofeidian, Bohai Sea	China
Aurelia coerulea		KP692775				JJZ21	36.112 N 120.322 E	Qingdao, Yellow Sea	China
Aurelia coerulea		KP692776				JJZ22	36.112 N 120.322 E	Qingdao, Yellow Sea	China
Aurelia coerulea		KP692777				JFHH03	36.918 N 122.410 E	Rongcheng, Yellow Sea	China
Aurelia coerulea		KP692778				JFHH06	36.918 N 122.410 E	Rongcheng, Yellow Sea	China
Aurelia coerulea		KP692779				JFHH17	36.918 N 122.410 E	Rongcheng, Yellow Sea	China
Aurelia coerulea		KP692780				JFHH21	36.918 N 122.410 E	Rongcheng, Yellow Sea	China
Aurelia coerulea		KP692781				JFHH28	36.918 N 122.410 E	Rongcheng, Yellow Sea	China
Aurelia coerulea		KP692782				JYT07	37.536 N 121.424 E	Yantai, Yellow Sea	China
Aurelia coerulea		KP692783				JYT22	37.536 N 121.424 E	Yantai, Yellow Sea	China
Aurelia coerulea		KP692784				JTY701	37.536 N 121.424 E	Yantai, Yellow Sea	China
Aurelia coerulea		KP692785				JYT702	37.536 N 121.424 E	Yantai, Yellow Sea	China
Aurelia coerulea		KP692786				JYT705	37.536 N 121.424 E	Yantai, Yellow Sea	China
Aurelia coerulea		KX691554			NSAM00011S_Varano		41.8822 N 15.7399 E	Varano Lagoon	Italy
Aurelia coerulea		KX691584			AUSP6_SabaudiaLake		41.2699 N 13.0341 E	Sabaudia Lake	Italy
Aurelia coerulea		KX691589			NSAM00033Z_Empuriabrava		42.2466 N 3.1351 E	Empuriabrava, Catalunya	Spain
Aurelia coerulea		KX691593			NSAM00034F_Empuriabrava		42.2466 N 3.1351 E	Empuriabrava, Catalunya	Spain
Aurelia coerulea		KX691594			NSAM00034G_Empuriabrava		42.2466 N 3.1351 E	Empuriabrava, Catalunya	Spain
Aurelia coerulea		KX691595			NSAM00034H_Empuriabrava		42.2466 N 3.1351 E	Empuriabrava, Catalunya	Spain
Aurelia coerulea		KX691596			NSAM00034I_Empuriabrava		42.2466 N 3.1351 E	Empuriabrava, Catalunya	Spain
Aurelia coerulea		KX691598			NSAM00034K_Empuriabrava		42.2466 N 3.1351 E	Empuriabrava, Catalunya	Spain
Aurelia coerulea		KX691599			NSAM00034L_Empuriabrava		42.2466 N 3.1351 E	Empuriabrava, Catalunya	Spain
Aurelia coerulea		LC191578					35.4905 N 135.3688 E	Maizuru Fisheries Research Station, Kyoto University	Japan
Aurelia coerulea		LC191579					35.4905 N 135.3688 E	Maizuru Fisheries Research Station, Kyoto University	Japan
Aurelia coerulea		LC191580					35.4905 N 135.3688 E	Maizuru Fisheries Research Station, Kyoto University	Japan
Aurelia coerulea		LK022703				AAUSP2	34.5323 N 18.0538 E	Central Mediterranean
Aurelia coerulea		LK022704				AAUSP6	34.5323 N 18.0538 E	Central Mediterranean
Aurelia coerulea		MN531720			p.12.5.17			Moody Gardens Aquarium, Texas	USA
Aurelia coerulea		MN531721			p.1.20.18			Moody Gardens Aquarium, Texas	USA
Aurelia coerulea		MZ052205			JLA3			National Aquarium, Maryland	USA
Aurelia columbia sp. nov.		AY903068	AY319843		Sooke1		48.369 N 123.718 W	Sooke Inlet, Vancouver, British Columbia	Canada
Aurelia columbia sp. nov.		AY903069	AY319844		Sooke2		48.369 N 123.718 W	Sooke Inlet, Vancouver, British Columbia	Canada
Aurelia columbia sp. nov.	MZ061824	MZ052208			UF12778	UF12778	48.544899 N 123.003267 W	San Juan Island, Washington	USA
Aurelia columbia sp. nov.		AY319474			ALBC3		51.401 N 130.248 W	British Columbia	Canada
Aurelia columbia sp. nov.		AY903070			Sooke3		48.369 N 123.718 W	Sooke Inlet, Vancouver, British Columbia	Canada
Aurelia columbia sp. nov.		AY903071			Sooke5		48.369 N 123.718 W	Sooke Inlet, Vancouver, British Columbia	Canada
Aurelia columbia sp. nov.		AY903072			Todd2		48.6500 N 123.4833 W	Todd Inlet, British Columbia	Canada
Aurelia columbia sp. nov.		AY903073			Todd4		48.6500 N 123.4833 W	Todd Inlet, British Columbia	Canada
Aurelia columbia sp. nov.		KBCSM036-14					48.768736 N 123.451825 W	Fulford Harbour, British Columbia	Canada
Aurelia columbia sp. nov.		KBCSM637-14					48.768736 N 123.451825 W	Fulford Harbour, British Columbia	Canada
Aurelia columbia sp. nov.		KHBC268-13						Shaw Ocean Discovery Center	Canada
Aurelia columbia sp. nov.		KHBC307-13						Shaw Ocean Discovery Center	Canada
Aurelia columbia sp. nov.		KHBC308-13						Shaw Ocean Discovery Center	Canada
Aurelia columbia sp. nov.		MF742097			USWAQCN	M0D021064D	47.79865 N 122.8664 W	Quilcene Bay, Washington	USA
Aurelia columbia sp. nov.		MF742098			USWAQCN	M0D021065E	47.79865 N 122.8664 W	Quilcene Bay, Washington	USA
Aurelia columbia sp. nov.		MF742099			USWAQCN	M0D021068H	47.79865 N 122.8664 W	Quilcene Bay, Washington	USA
Aurelia columbia sp. nov.		MF742100			USWAQCN	M0D021066F	47.79865 N 122.8664 W	Quilcene Bay, Washington	USA
Aurelia columbia sp. nov.		MF742101			USWAQCN	M0D021067G	47.79865 N 122.8664 W	Quilcene Bay, Washington	USA
Aurelia columbia sp. nov.		MH242678				BMBM-0831	48.5453 N 123.012 W	FHL Dock, Washington, San Juan County, San Juan Island	USA
Aurelia dubia			AF461410		IODUB1		25.216 N 55.068 E	Dubai	United Arab Emirates
Aurelia dubia	AF461402						21.360 N 48.090 E	Arabian Peninsula	Dubai?
Aurelia hyalina			AY935211		limbata_Alaska		59.633 N 151.4500 W	Kachemak Bay, Alaska	USA
Aurelia hyalina	MZ061770	MZ052164			GR10-051.1		63.933967 N 52.920533 W	Labrador Sea	Greenland
Aurelia hyalina	MZ061771	MZ052165			GR10-051.2		63.933967 N 52.920533 W	Labrador Sea	Greenland
Aurelia hyalina	MZ061772	MZ052166			GR10-051.3		63.933967 N 52.920533 W	Labrador Sea	Greenland
Aurelia hyalina	MZ061773	MZ052167			GR10-051.4		63.933967 N 52.920533 W	Labrador Sea	Greenland
Aurelia hyalina	MZ061774	MZ052168			GR10-055.1		63.945050 N 52.932967 W	Labrador Sea	Greenland
Aurelia hyalina	MZ061775	MZ052169			GR10-055.2		63.945050 N 52.932967 W	Labrador Sea	Greenland
Aurelia hyalina	MZ061818	MZ052207			RU085	USNM1643575	72.315000 N 175.984000 E	Chukchi Sea	Russia
Aurelia hyalina	MZ061819				RU152	USNM1643579	65.578000 N 168.348333 E	Chukchi Sea	Russia
Aurelia hyalina	MZ061820				RU154.1	USNM1643580	65.578000 N 168.348333 E	Chukchi Sea	Russia
Aurelia hyalina	MZ061821				RU154.2		65.578000 N 168.348333 E	Chukchi Sea	Russia
Aurelia hyalina	MZ061822				RU155.1		65.578000 N 168.348333 E	Chukchi Sea	Russia
Aurelia hyalina	MZ061823				RU155.2		65.578000 N 168.348333 E	Chukchi Sea	Russia
Aurelia hyalina		AY903067			limbata		59.633 N 151.4500 W	Kachemak Bay, Alaska	USA
Aurelia hyalina		MG421131				09PROBE-CC013	58.801400 N 93.819500 W	Churchill, Manitoba	Canada
Aurelia hyalina		MG421668				10PROBE-19082	58.837700 N 4.237600 W	Churchill, Manitoba	Canada
Aurelia hyalina		MG422716				10PROBE-19090	58.837700 N 4.237600 W	Churchill, Manitoba	Canada
Aurelia hyalina		RDMPC162-10					58.837700 N 4.237600 W	Churchill, Manitoba	Canada
Aurelia insularia sp. nov.	MZ061787	MZ052180		MZ061834	JL15	MZUSP8649	23.098 S 44.278 W	Pinguino Wreck, Ilha Grande, Rio de Janeiro	Brazil
Aurelia insularia sp. nov.	MZ061789	MZ052182		MZ061836	JL17		23.805 S 45.391 W	Marina de São Sebastião, São Paulo	Brazil
Aurelia insularia sp. nov.	MZ061805			MZ061852	JL33		27.2787 S 48.3789 W	Pedra do Boi, ReBIO Arvoredo, Florianopolis, Santa Catarina	Brazil
Aurelia insularia sp. nov.	MZ061806			MZ061853	JL34		27.2846 S 48.3756 W	Saco do Capim, ReBIO Arvoredo, Florianopolis, Santa Catarina	Brazil
Aurelia insularia sp. nov.	MZ061807		MZ061863	MZ061854	JL35	MZUSP8647	27.1686 S 48.4010 W	Lili Wreck, ReBIO Arvoredo, Florianopolis, Santa Catarina	Brazil
Aurelia insularia sp. nov.	MZ061813	MZ052202		MZ061857	JL42		27.2846 S 48.3756 W	Saco do Capim, ReBIO Arvoredo, Florianopolis, Santa Catarina	Brazil
Aurelia insularia sp. nov.	MZ061814		MZ061865	MZ061858	JL43		27.2846 S 48.3756 W	Saco do Capim, ReBIO Arvoredo, Florianopolis, Santa Catarina	Brazil
Aurelia insularia sp. nov.	MT709255						25.081139 N 80.450917 W	Rock Harbor (near Key Largo), Florida	USA
Aurelia insularia sp. nov.	MZ061811				JL40		23.098 S 44.278 W	Pinguino Wreck, Ilha Grande, Rio de Janeiro	Brazil
Aurelia labiata	MZ061756	MZ052152			AGC18-048		60.536220 N 145.825434 W	Cordova, Alaska	USA
Aurelia labiata	MZ061757	MZ052153			AGC18-049		60.536220 N 145.825434 W	Cordova, Alaska	USA
Aurelia labiata		AY903074			NewportBay3		44.6351 N 124.0682 W	Newport Bay, Oregon	USA
Aurelia labiata		AY903075			TomalesBay2		38.2344 N 122.9802 W	Tomales Bay, California	USA
Aurelia labiata		AY903076			TomalesBay3		38.2344 N 122.9802 W	Tomales Bay, California	USA
Aurelia labiata		AY903077			TomalesBay4		38.2344 N 122.9802 W	Tomales Bay, California	USA
Aurelia labiata		MF742127			USWAGSH	M0D021854N	47.5 N 125.07 W	Grays Harbor, Washington	USA
Aurelia labiata		MF742128			USWAGSH	M0D021855O	47.5 N 125.07 W	Grays Harbor, Washington	USA
Aurelia labiata		MF742129			USWAGSH	M0D021856P	47.5 N 125.07 W	Grays Harbor, Washington	USA
Aurelia labiata		MF742130			USWAGSH	M0D021861U	47.5 N 125.07 W	Grays Harbor, Washington	USA
Aurelia labiata		MF742131			USWAGSH	M0D021862V	47.5 N 125.07 W	Grays Harbor, Washington	USA
Aurelia labiata		MF742132			USWAGSH	M0D021872F	47.5 N 125.07 W	Grays Harbor, Washington	USA
Aurelia limbata	MZ061797	MZ052190	MZ061861	MZ061844	JL25	MZUSP8661	39.081961 N 141.824288 E	Okirai Bay, Ofunato	Japan
Aurelia limbata			AY935215		AJ13h		43.259 N 141.204 E	Hokkaido	Japan
Aurelia limbata			KX943298		1		37.014 N 129.965 E	East Sea	South Korea
Aurelia limbata			KX943299		2		37.014 N 129.965 E	East Sea	South Korea
Aurelia limbata			KX943300		3		37.014 N 129.965 E	East Sea	South Korea
Aurelia limbata			KX943301		4		37.014 N 129.965 E	East Sea	South Korea
Aurelia limbata	MZ061809	MZ052199	MZ061864		JL38			Kamo Aquarium	Japan
Aurelia limbata	AB720914
Aurelia limbata	JX393254							Kamo Aquarium	Japan
Aurelia limbata		AY903189			A. limbata		43.259 N 141.204 E	Hokkaido	Japan
Aurelia malayensis sp. nov.	MZ061801	MZ052194		MZ061848	JL29	MZUSP8651	9.645533 N 118.785398 E	Palawan	Philippines
Aurelia malayensis sp. nov.	MZ061803	MZ052196		MZ061850	JL31		26.39 N 127.90 E	Okinawa	Japan
Aurelia malayensis sp. nov.	MZ061804	MZ052197		MZ061851	JL32		9.645533 N 118.785398 E	Palawan	Philippines
Aurelia malayensis sp. nov.			AY319834		OLO30		7.2572 N 134.3825 E	Uet era Ongael, Koror State	Palau
Aurelia malayensis sp. nov.			AY319835		OLO31		7.2572 N 134.3825 E	Uet era Ongael, Koror State	Palau
Aurelia malayensis sp. nov.			AY935208		2_OLO31		7.2572 N 134.3825 E	Uet era Ongael, Koror State	Palau
Aurelia malayensis sp. nov.		AY903097			HLM7		7.149 N 134.353 E	Hotwater Lake, Mecherchar, Koror State	Palau
Aurelia malayensis sp. nov.		AY903098			HLM26		7.149 N 134.353 E	Hotwater Lake, Mecherchar, Koror State	Palau
Aurelia malayensis sp. nov.		AY903101			OTM4		7.1500 N 134.3833 E	Ongeim'l Tketau, Mecherchar, Koror State	Palau
Aurelia malayensis sp. nov.		AY903102			OTM2		7.1500 N 134.3833 E	Ongeim'l Tketau, Mecherchar, Koror State	Palau
Aurelia malayensis sp. nov.		AY903107			OngaelLO29		7.2572 N 134.3825 E	Uet era Ongael, Koror State	Palau
Aurelia malayensis sp. nov.		AY903108			OngaelLO28		7.2572 N 134.3825 E	Uet era Ongael, Koror State	Palau
Aurelia malayensis sp. nov.		AY903109			OngaelLO31		7.2572 N 134.3825 E	Uet era Ongael, Koror State	Palau
Aurelia malayensis sp. nov.		AY903110			BJLK1		7.3166 N 134.5166 E	Uet era Ngermeuangel, Ngermeuangel, Koror State	Palau
Aurelia malayensis sp. nov.		AY903136			AlaWaiOahu1		21.2852 N 157.8411 W	Ala Wai Marina, Oahu	USA
Aurelia malayensis sp. nov.		AY903137			AlaWaiOahu2		21.2852 N 157.8411 W	Ala Wai Marina, Oahu	USA
Aurelia malayensis sp. nov.		AY903144			Kkbn2		2.1000 N 118.3300 E	Halimeda Lake, Kakaban Island, Berau	Indonesia
Aurelia malayensis sp. nov.		AY903145			Kkbn3		2.1000 N 118.3300 E	Halimeda Lake, Kakaban Island, Berau	Indonesia
Aurelia malayensis sp. nov.		MF742085			IDPADCG	M0D007295O	0.454817 S 130.493 E	Danau Ctenphore, Gam, Papua	Indonesia
Aurelia malayensis sp. nov.		MF742086			IDPADCG	M0D007296P	0.454817 S 130.493 E	Danau Ctenphore, Gam, Papua	Indonesia
Aurelia malayensis sp. nov.		MF742087			IDPADCG	M0D007304X	0.454817 S 130.493 E	Danau Ctenphore, Gam, Papua	Indonesia
Aurelia malayensis sp. nov.		MF742088			IDPADCG	M0D007305Y	0.454817 S 130.493 E	Danau Ctenphore, Gam, Papua	Indonesia
Aurelia malayensis sp. nov.		MF742089			IDPADCG	M0D007306Z	0.454817 S 130.493 E	Danau Ctenphore, Gam, Papua	Indonesia
Aurelia malayensis sp. nov.		MF742090			IDPADCG	M0D007307A	0.454817 S 130.493 E	Danau Ctenphore, Gam, Papua	Indonesia
Aurelia malayensis sp. nov.		MF742091			IDBEDKK	M0D008489M	2.150333 N 118.514167 E	Kalaban, Berau	Indonesia
Aurelia malayensis sp. nov.		MF742092			IDBEDKK	M0D008491O	2.150333 N 118.514167 E	Kalaban, Berau	Indonesia
Aurelia malayensis sp. nov.		MF742102			PWKOHLM	M0D002689K	7.149 N 134.353 E	Hotwater Lake, Mecherchar, Koror State	Palau
Aurelia malayensis sp. nov.		MF742103			PWKOHLM	M0D002690L	7.149 N 134.353 E	Hotwater Lake, Mecherchar, Koror State	Palau
Aurelia malayensis sp. nov.		MF742104			PWKOHLM	M0D002691M	7.149 N 134.353 E	Hotwater Lake, Mecherchar, Koror State	Palau
Aurelia malayensis sp. nov.		MF742105			PWKOHLM	M0D002692N	7.149 N 134.353 E	Hotwater Lake, Mecherchar, Koror State	Palau
Aurelia malayensis sp. nov.		MF742106			PWKOHLM	M0D002693O	7.149 N 134.353 E	Hotwater Lake, Mecherchar, Koror State	Palau
Aurelia malayensis sp. nov.		MF742107			PWKOHLM	M0D002694P	7.149 N 134.353 E	Hotwater Lake, Mecherchar, Koror State	Palau
Aurelia malayensis sp. nov.		MF742108			IDBEDKK	M0D008492P	2.150333 N 118.514167 E	Kalaban, Berau	Indonesia
Aurelia malayensis sp. nov.		MF742109			IDBEDKK	M0D008493Q	2.150333 N 118.514167 E	Kalaban, Berau	Indonesia
Aurelia malayensis sp. nov.		MF742110			IDBEDKK	M0D008494R	2.150333 N 118.514167 E	Kalaban, Berau	Indonesia
Aurelia malayensis sp. nov.		MF742120			PWKONLK	M0D009273Q	7.3166 N 134.5166 E	Uet era Ngermeuangel, Ngermeuangel, Koror State	Palau
Aurelia malayensis sp. nov.		MF742121			PWKONLK	M0D009274R	7.3166 N 134.5166 E	Uet era Ngermeuangel, Ngermeuangel, Koror State	Palau
Aurelia malayensis sp. nov.		MF742122			PWKONLK	M0D009275S	7.3166 N 134.5166 E	Uet era Ngermeuangel, Ngermeuangel, Koror State	Palau
Aurelia malayensis sp. nov.		MF742123			PWKONLK	M0D009276T	7.3166 N 134.5166 E	Uet era Ngermeuangel, Ngermeuangel, Koror State	Palau
Aurelia malayensis sp. nov.		MF742125			PWKONLK	M0D009318J	7.3166 N 134.5166 E	Uet era Ngermeuangel, Ngermeuangel, Koror State	Palau
Aurelia malayensis sp. nov.		MF742126			PWKONLK	M0D009321M	7.3166 N 134.5166 E	Uet era Ngermeuangel, Ngermeuangel, Koror State	Palau
Aurelia marginalis	KY610677	KY564357		KY610894	M0D014701K_MXTBCAR		18.362153 N 93.597010 W	Tabasco, Carmen-Machona	Mexico
Aurelia marginalis	KY610678	KY564353		KY610895	M0D014702L_MXTBCAR		18.362153 N 93.597010 W	Tabasco, Carmen-Machona	Mexico
Aurelia marginalis	KY610679	KY564355		KY610896	M0D014703M_MXTBCAR		18.362153 N 93.597010 W	Tabasco, Carmen-Machona	Mexico
Aurelia marginalis			KU984374		DI'03-15A		30.1577 N 88.1394 W	Dauphin Island, Alabama	USA
Aurelia marginalis			KU984375		DI'03-15B		30.1577 N 88.1394 W	Dauphin Island, Alabama	USA
Aurelia marginalis			KU984384		DI'05-1A		30.1577 N 88.1394 W	Dauphin Island, Alabama	USA
Aurelia marginalis			KU984385		DI'05-1B		30.1577 N 88.1394 W	Dauphin Island, Alabama	USA
Aurelia marginalis			KU984386		DI'05-2A		30.1577 N 88.1394 W	Dauphin Island, Alabama	USA
Aurelia marginalis			KU984387		DI'05-2B		30.1577 N 88.1394 W	Dauphin Island, Alabama	USA
Aurelia marginalis			KU984388		DI'05-3A		30.1577 N 88.1394 W	Dauphin Island, Alabama	USA
Aurelia marginalis			KU984389		DI'05-3B		30.1577 N 88.1394 W	Dauphin Island, Alabama	USA
Aurelia marginalis			KU984390		LK'06-1A		24.7808 N 80.6866 W	Long Key, Florida	USA
Aurelia marginalis			KU984391		LK'06-1B		24.7808 N 80.6866 W	Long Key, Florida	USA
Aurelia marginalis			KU984394		LK'06-3A		24.7808 N 80.6866 W	Long Key, Florida	USA
Aurelia marginalis			KU984395		LK'06-3B		24.7808 N 80.6866 W	Long Key, Florida	USA
Aurelia marginalis			KU984399		LK'06-6A		24.7808 N 80.6866 W	Long Key, Florida	USA
Aurelia marginalis			KU984400		LK'06-6B		24.7808 N 80.6866 W	Long Key, Florida	USA
Aurelia marginalis			KU984403		LK'06-8A		24.7808 N 80.6866 W	Long Key, Florida	USA
Aurelia marginalis			KU984404		LK'06-8B		24.7808 N 80.6866 W	Long Key, Florida	USA
Aurelia marginalis			KU984405		LK'06-9A		24.7808 N 80.6866 W	Long Key, Florida	USA
Aurelia marginalis			KU984406		LK'06-9B		24.7808 N 80.6866 W	Long Key, Florida	USA
Aurelia marginalis			KU984407		LK'06-10A		24.7808 N 80.6866 W	Long Key, Florida	USA
Aurelia marginalis			KU984408		LK'06-10B		24.7808 N 80.6866 W	Long Key, Florida	USA
Aurelia marginalis			KU984409		LK'06-11A		24.7808 N 80.6866 W	Long Key, Florida	USA
Aurelia marginalis			KU984410		LK'06-11B		24.7808 N 80.6866 W	Long Key, Florida	USA
Aurelia marginalis			KU984411		LK'06-12A		24.7808 N 80.6866 W	Long Key, Florida	USA
Aurelia marginalis			KU984412		LK'06-12B		24.7808 N 80.6866 W	Long Key, Florida	USA
Aurelia marginalis			KU984413		LK'06-13B		24.7808 N 80.6866 W	Long Key, Florida	USA
Aurelia marginalis			KU984414		LK'06-14A		24.7808 N 80.6866 W	Long Key, Florida	USA
Aurelia marginalis			KU984417		DI'03-9A		30.1577 N 88.1394 W	Dauphin Island, Alabama	USA
Aurelia marginalis			KU984418		DI'03-9B		30.1577 N 88.1394 W	Dauphin Island, Alabama	USA
Aurelia marginalis			KU984419		DI'03-10A		30.1577 N 88.1394 W	Dauphin Island, Alabama	USA
Aurelia marginalis			KU984420		DI'03-10B		30.1577 N 88.1394 W	Dauphin Island, Alabama	USA
Aurelia marginalis			KU984421		DI'03-11A		30.1577 N 88.1394 W	Dauphin Island, Alabama	USA
Aurelia marginalis			KU984422		DI'03-11B		30.1577 N 88.1394 W	Dauphin Island, Alabama	USA
Aurelia marginalis			KU984423		DI'03-12A		30.1577 N 88.1394 W	Dauphin Island, Alabama	USA
Aurelia marginalis			KU984424		DI'03-12B		30.1577 N 88.1394 W	Dauphin Island, Alabama	USA
Aurelia marginalis	MZ061734	MZ052136			AGC18-011		24.7808 N 80.6866 W	Long Key, Florida	USA
Aurelia marginalis	MZ061735	MZ052137			AGC18-013		24.7808 N 80.6866 W	Long Key, Florida	USA
Aurelia marginalis	MZ061736				AGC18-018		30.1577 N 88.1394 W	Dauphin Island, Alabama	USA
Aurelia marginalis	MZ061737	MZ052138			AGC18-020		30.1577 N 88.1394 W	Dauphin Island, Alabama	USA
Aurelia marginalis	MZ061738				AGC18-023		30.1577 N 88.1394 W	Dauphin Island, Alabama	USA
Aurelia marginalis	MZ061747	MZ052145			AGC18-033		30.1577 N 88.1394 W	Dauphin Island, Alabama	USA
Aurelia marginalis	MZ061748	MZ052146			AGC18-035		30.1577 N 88.1394 W	Dauphin Island, Alabama	USA
Aurelia marginalis	MZ061749	MZ052147			AGC18-036		30.1577 N 88.1394 W	Dauphin Island, Alabama	USA
Aurelia marginalis	MZ061750	MZ052148			AGC18-038		30.1577 N 88.1394 W	Dauphin Island, Alabama	USA
Aurelia marginalis	MZ061751				AGC18-039		30.1577 N 88.1394 W	Dauphin Island, Alabama	USA
Aurelia marginalis	MZ061752	MZ052149			AGC18-041		30.1577 N 88.1394 W	Dauphin Island, Alabama	USA
Aurelia marginalis	MZ061753	MZ052150			AGC18-042		30.1577 N 88.1394 W	Dauphin Island, Alabama	USA
Aurelia marginalis	MZ061755	MZ052151			AGC18-046		30.1577 N 88.1394 W	Dauphin Island, Alabama	USA
Aurelia marginalis	MZ061758	MZ052155			AGC18-051		30.1577 N 88.1394 W	Dauphin Island, Alabama	USA
Aurelia marginalis	MZ061759	MZ052156			AGC18-052		30.1577 N 88.1394 W	Dauphin Island, Alabama	USA
Aurelia marginalis	MZ061760	MZ052157			AGC18-053		30.1577 N 88.1394 W	Dauphin Island, Alabama	USA
Aurelia marginalis	MZ061761	MZ052158			AGC18-054		30.1577 N 88.1394 W	Dauphin Island, Alabama	USA
Aurelia marginalis	MZ061762	MZ052159			AGC18-055		30.1577 N 88.1394 W	Dauphin Island, Alabama	USA
Aurelia marginalis	MZ061763				AGC18-056		30.1577 N 88.1394 W	Dauphin Island, Alabama	USA
Aurelia marginalis	MZ061764	MZ052160			AGC18-057		30.1577 N 88.1394 W	Dauphin Island, Alabama	USA
Aurelia marginalis	MZ061765				AGC18-058		30.1577 N 88.1394 W	Dauphin Island, Alabama	USA
Aurelia marginalis		AY903172			Gulf_of_Mexico_A_1		30 N 88 W	Alabama, Gulf of Mexico	USA
Aurelia marginalis		AY903173			Gulf_of_Mexico_A_2		30 N 88 W	Alabama, Gulf of Mexico	USA
Aurelia marginalis		AY903174			Gulf_of_Mexico_B_3		30 N 88 W	Alabama, Gulf of Mexico	USA
Aurelia marginalis		AY903175			Gulf_of_Mexico_B_4		30 N 88 W	Alabama, Gulf of Mexico	USA
Aurelia marginalis		AY903176			Gulf_of_Mexico_C_5		30 N 88 W	Alabama, Gulf of Mexico	USA
Aurelia marginalis		GQ120090			Auau01			Atlantic Ocean
Aurelia marginalis		KU984342			D502		30.1577 N 88.1394 W	Dauphin Island, Alabama	USA
Aurelia marginalis		KU984343			D506		30.1577 N 88.1394 W	Dauphin Island, Alabama	USA
Aurelia marginalis		KU984344			D507		30.1577 N 88.1394 W	Dauphin Island, Alabama	USA
Aurelia marginalis		KU984345			D512		24.7808 N 80.6866 W	Long Key, Florida	USA
Aurelia marginalis		KU984347			D514		24.7808 N 80.6866 W	Long Key, Florida	USA
Aurelia marginalis		KU984350			D520		24.7808 N 80.6866 W	Long Key, Florida	USA
Aurelia marginalis		KU984352			D523		24.7808 N 80.6866 W	Long Key, Florida	USA
Aurelia marginalis		KU984353			D524		24.7808 N 80.6866 W	Long Key, Florida	USA
Aurelia marginalis		KU984354			D525		24.7808 N 80.6866 W	Long Key, Florida	USA
Aurelia marginalis		KU984355			D526		24.7808 N 80.6866 W	Long Key, Florida	USA
Aurelia marginalis		KU984356			D527		24.7808 N 80.6866 W	Long Key, Florida	USA
Aurelia marginalis		KU984357			D528		24.7808 N 80.6866 W	Long Key, Florida	USA
Aurelia marginalis		KU984358			D530		24.7808 N 80.6866 W	Long Key, Florida	USA
Aurelia marginalis		KU984360			D797		30.1577 N 88.1394 W	Dauphin Island, Alabama	USA
Aurelia marginalis		KU984361			D799		30.1577 N 88.1394 W	Dauphin Island, Alabama	USA
Aurelia marginalis		KU984362			D800		30.1577 N 88.1394 W	Dauphin Island, Alabama	USA
Aurelia marginalis		KU984363			D801		30.1577 N 88.1394 W	Dauphin Island, Alabama	USA
Aurelia marginalis		KY564354			M0D014704N_MXTBCAR		18.362153 N 93.597010 W	Tabasco, Carmen Machona	Mexico
Aurelia marginalis		KY564356			M0D0147050_MXTBCAR		18.362153 N 93.597010 W	Tabasco, Carmen Machona	Mexico
Aurelia marginalis		MN531716			p.08.18.17.01		29.464658 N 94.772327 W	Galveston Bay, Texas	USA
Aurelia marginalis		MN531717			p.6.1.19.AF2		29.464658 N 94.772327 W	Galveston Bay, Texas	USA
Aurelia marginalis		MN531719			p.6.3.19.AF4		29.464658 N 94.772327 W	Galveston Bay, Texas	USA
Aurelia marginalis		MZ052154			AGC18-050		30.1577 N 88.1394 W	Dauphin Island, Alabama	USA
Aurelia mianzani sp. nov.	KY610671	KY564347		KY610899	M0D014936L_ARBABSB		35.935550 S 56.985622 W	Bahia Saborrombon	Argentina
Aurelia mianzani sp. nov.	KY610672	KY564348		KY610900	M0D014938N_ARBABSB		35.935550 S 56.985622 W	Bahia Saborrombon	Argentina
Aurelia mianzani sp. nov.	KY610673	KY564349		KY610901	M0D014937M_ARBABSB		35.935550 S 56.985622 W	Bahia Saborrombon	Argentina
Aurelia mianzani sp. nov.		HQ913939	HQ914014		AA2501		40.142 S 59.069 W	South Atlantic	Argentina
Aurelia mianzani sp. nov.	MZ061817	MZ052206			LAB16	MZUSP8653	23.827138 S 45.422071 W	Praia do Segredo, São Paulo	Brazil
Aurelia miyakei sp. nov.	MZ061802	MZ052195	MZ061862	MZ061849	JL30	MZUSP8655	13.280556 N 100.913333 E	Saen Suk, Gulf of Thailand	Thailand
Aurelia miyakei sp. nov.			AF461412		MCA1			Tropical Aquarium Community
Aurelia miyakei sp. nov.	AF461404							Tropical Aquarium Community
Aurelia miyakei sp. nov.		AY903213			Kwajalein1		8.7333 N 167.7333 E	Kwajalein	Marshall Islands
Aurelia montyi sp. nov.			KU984364		DI'03-1A		30.1577 N 88.1394 W	Dauphin Island, Alabama	USA
Aurelia montyi sp. nov.			KU984365		DI'03-1B		30.1577 N 88.1394 W	Dauphin Island, Alabama	USA
Aurelia montyi sp. nov.			KU984366		DI'03-2A		30.1577 N 88.1394 W	Dauphin Island, Alabama	USA
Aurelia montyi sp. nov.			KU984367		DI'03-2B		30.1577 N 88.1394 W	Dauphin Island, Alabama	USA
Aurelia montyi sp. nov.			KU984368		DI'03-13A		30.1577 N 88.1394 W	Dauphin Island, Alabama	USA
Aurelia montyi sp. nov.			KU984369		DI'03-13B		30.1577 N 88.1394 W	Dauphin Island, Alabama	USA
Aurelia montyi sp. nov.			KU984370		DI'03-14A		30.1577 N 88.1394 W	Dauphin Island, Alabama	USA
Aurelia montyi sp. nov.			KU984371		DI'03-14B		30.1577 N 88.1394 W	Dauphin Island, Alabama	USA
Aurelia montyi sp. nov.			KU984372		DI'03-3A		30.1577 N 88.1394 W	Dauphin Island, Alabama	USA
Aurelia montyi sp. nov.			KU984373		DI'03-3B		30.1577 N 88.1394 W	Dauphin Island, Alabama	USA
Aurelia montyi sp. nov.			KU984378		DI'03-5A		30.1577 N 88.1394 W	Dauphin Island, Alabama	USA
Aurelia montyi sp. nov.			KU984379		DI'03-5B		30.1577 N 88.1394 W	Dauphin Island, Alabama	USA
Aurelia montyi sp. nov.			KU984380		DI'03-6A		30.1577 N 88.1394 W	Dauphin Island, Alabama	USA
Aurelia montyi sp. nov.			KU984381		DI'03-6B		30.1577 N 88.1394 W	Dauphin Island, Alabama	USA
Aurelia montyi sp. nov.			KU984382		DI'03-7A		30.1577 N 88.1394 W	Dauphin Island, Alabama	USA
Aurelia montyi sp. nov.			KU984383		DI'03-7B		30.1577 N 88.1394 W	Dauphin Island, Alabama	USA
Aurelia montyi sp. nov.			KU984392		LK'06-2A		24.7808 N 80.6866 W	Long Key, Florida	USA
Aurelia montyi sp. nov.			KU984393		LK'06-2B		24.7808 N 80.6866 W	Long Key, Florida	USA
Aurelia montyi sp. nov.			KU984396		LK'06-5A		24.7808 N 80.6866 W	Long Key, Florida	USA
Aurelia montyi sp. nov.			KU984397		LK'06-5B		24.7808 N 80.6866 W	Long Key, Florida	USA
Aurelia montyi sp. nov.			KU984398		LK'06-5C		24.7808 N 80.6866 W	Long Key, Florida	USA
Aurelia montyi sp. nov.			KU984401		LK'06-7A		24.7808 N 80.6866 W	Long Key, Florida	USA
Aurelia montyi sp. nov.			KU984402		LK'06-7B		24.7808 N 80.6866 W	Long Key, Florida	USA
Aurelia montyi sp. nov.			KU984415		DI'03-8A		30.1577 N 88.1394 W	Dauphin Island, Alabama	USA
Aurelia montyi sp. nov.			KU984416		DI'03-8B		30.1577 N 88.1394 W	Dauphin Island, Alabama	USA
Aurelia montyi sp. nov.	MZ061739	MZ052139			AGC18-024	USNM1643581	30.1577 N 88.1394 W	Dauphin Island, Alabama	USA
Aurelia montyi sp. nov.	MZ061740	MZ052140			AGC18-026	USNM1643582	30.1577 N 88.1394 W	Dauphin Island, Alabama	USA
Aurelia montyi sp. nov.	MZ061741	MZ052141			AGC18-027	USNM1643583	30.1577 N 88.1394 W	Dauphin Island, Alabama	USA
Aurelia montyi sp. nov.	MZ061742				AGC18-028		30.1577 N 88.1394 W	Dauphin Island, Alabama	USA
Aurelia montyi sp. nov.	MZ061744	MZ052142			AGC18-030		30.1577 N 88.1394 W	Dauphin Island, Alabama	USA
Aurelia montyi sp. nov.	MZ061745	MZ052143			AGC18-031		30.1577 N 88.1394 W	Dauphin Island, Alabama	USA
Aurelia montyi sp. nov.	MZ061746	MZ052144			AGC18-032		30.1577 N 88.1394 W	Dauphin Island, Alabama	USA
Aurelia montyi sp. nov.		KU984335			D454		30.1577 N 88.1394 W	Dauphin Island, Alabama	USA
Aurelia montyi sp. nov.		KU984336			D455		30.1577 N 88.1394 W	Dauphin Island, Alabama	USA
Aurelia montyi sp. nov.		KU984337			D460		30.1577 N 88.1394 W	Dauphin Island, Alabama	USA
Aurelia montyi sp. nov.		KU984339			D468		30.1577 N 88.1394 W	Dauphin Island, Alabama	USA
Aurelia montyi sp. nov.		KU984340			D469		30.1577 N 88.1394 W	Dauphin Island, Alabama	USA
Aurelia montyi sp. nov.		KU984341			D472		30.1577 N 88.1394 W	Dauphin Island, Alabama	USA
Aurelia montyi sp. nov.		KU984346			D513		24.7808 N 80.6866 W	Long Key, Florida	USA
Aurelia montyi sp. nov.		KU984348			D515		24.7808 N 80.6866 W	Long Key, Florida	USA
Aurelia montyi sp. nov.		KU984349			D516		24.7808 N 80.6866 W	Long Key, Florida	USA
Aurelia montyi sp. nov.		KU984351			D521		24.7808 N 80.6866 W	Long Key, Florida	USA
Aurelia montyi sp. nov.		KU984359			D742		30.1577 N 88.1394 W	Dauphin Island, Alabama	USA
Aurelia persea				HG964639			32.877778 N 34.975 E	Haifa Bay, East Mediterranean	Israel
Aurelia persea	HG964643						32.877778 N 34.975 E	Haifa Bay, East Mediterranean	Israel
Aurelia persea		HG964641					32.877778 N 34.975 E	Haifa Bay, East Mediterranean	Israel
Aurelia rara sp. nov.			KU984376		DI'03-4A		30.1577 N 88.1394 W	Dauphin Island, Alabama	USA
Aurelia rara sp. nov.			KU984377		DI'03-4B		30.1577 N 88.1394 W	Dauphin Island, Alabama	USA
Aurelia rara sp. nov.	MZ061743				AGC18-029	USNM1643584	30.1577 N 88.1394 W	Dauphin Island, Alabama	USA
Aurelia rara sp. nov.	MZ061754				AGC18-044	USNM1643585	30.1577 N 88.1394 W	Dauphin Island, Alabama	USA
Aurelia rara sp. nov.		KU984338			D464		30.1577 N 88.1394 W	Dauphin Island, Alabama	USA
Aurelia relicta		KX691561		KX691623	NSAM00022G_Mljet		42.723 N 17.501 E	Veliko Jezero, Mljet Island	Croatia
Aurelia relicta		KX691562		KX691624	NSAM00022H_Mljet		42.723 N 17.501 E	Veliko Jezero, Mljet Island	Croatia
Aurelia relicta		KX691563		KX691625	NSAM00022I_Mljet		42.723 N 17.501 E	Veliko Jezero, Mljet Island	Croatia
Aurelia relicta		KX691564		KX691626	NSAM00022J_Mljet		42.723 N 17.501 E	Veliko Jezero, Mljet Island	Croatia
Aurelia relicta		KX691565		KX691627	NSAM00022K_Mljet		42.723 N 17.501 E	Veliko Jezero, Mljet Island	Croatia
Aurelia relicta		KX691566		KX691628	NSAM00022L_Mljet		42.723 N 17.501 E	Veliko Jezero, Mljet Island	Croatia
Aurelia relicta		KX691567		KX691629	NSAM00022M_Mljet		42.723 N 17.501 E	Veliko Jezero, Mljet Island	Croatia
Aurelia relicta		KX691568		KX691630	NSAM00022N_Mljet		42.723 N 17.501 E	Veliko Jezero, Mljet Island	Croatia
Aurelia relicta			AF461409		MSMKL1		42.7713 N 17.3627 E	Mljet Lake	Croatia
Aurelia relicta		HQ913934	HQ914009		AA2201		42.7713 N 17.3627 E	Lake Mljet, South Adriatic Sea	Croatia
Aurelia relicta		HQ913935	HQ914010		AA2202		42.7713 N 17.3627 E	Lake Mljet, South Adriatic Sea	Croatia
Aurelia relicta		HQ913937	HQ914012		AA2205		42.7713 N 17.3627 E	Lake Mljet, South Adriatic Sea	Croatia
Aurelia relicta		HQ913942	HQ914016		AA2714
Aurelia relicta	AF461403
Aurelia relicta	MZ061729	MZ052133			AGC18-006		42.781231 N 17.347346 E	Malo Jezero, Mljet Island	Croatia
Aurelia relicta	MZ061730	MZ052134			AGC18-007		42.781231 N 17.347346 E	Malo Jezero, Mljet Island	Croatia
Aurelia relicta	MZ061731				AGC18-008		42.781231 N 17.347346 E	Malo Jezero, Mljet Island	Croatia
Aurelia relicta	MZ061732				AGC18-009		42.781231 N 17.347346 E	Malo Jezero, Mljet Island	Croatia
Aurelia relicta	MZ061733	MZ052135			AGC18-010		42.781231 N 17.347346 E	Malo Jezero, Mljet Island	Croatia
Aurelia relicta		AY903123			Benovic2		42.7713 N 17.3627 E	Veliko Jezero, Mljet Island	Croatia
Aurelia relicta		AY903124			Benovic4		42.7713 N 17.3627 E	Veliko Jezero, Mljet Island	Croatia
Aurelia relicta		AY903125			Benovic6		42.7713 N 17.3627 E	Veliko Jezero, Mljet Island	Croatia
Aurelia relicta		HQ913936			AA2204		42.7713 N 17.3627 E	Lake Mljet, South Adriatic Sea	Croatia
Aurelia relicta		KX691569			NSAM00022O_Mljet		42.723 N 17.501 E	Mljet Lake	Croatia
Aurelia relicta		KX691570			NSAM00022P_Mljet		42.723 N 17.501 E	Mljet Lake	Croatia
Aurelia relicta		KX691571			NSAM00022Q_Mljet		42.723 N 17.501 E	Mljet Lake	Croatia
Aurelia smithsoniana sp. nov.	KY610674	KY564351		KY610897	M0D021366T_PABTBDE		9.223490 N 82.219890 W	Bocas del Toro, Bahia de Delfines	Panama
Aurelia smithsoniana sp. nov.	KY610675	KY564352		KY610898	M0D021367U_PABTBDE		9.223490 N 82.219890 W	Bocas del Toro, Bahia de Delfines	Panama
Aurelia smithsoniana sp. nov.	MZ061808	MZ052198			JL36	MZUSP8656	9.2347 N 82.2584 W	Bocatorito Bay, Bocas del Toro	Panama
Aurelia smithsoniana sp. nov.		KY564350			M0D021365S_PABTBDE		9.223490 N 82.219890 W	Bocas del Toro, Bahia de Delfines	Panama
Aurelia solida		KX691572		KX691631	NSAM00038Q_Trieste		45.641 N 13.728 E	Trieste	Italy
Aurelia solida		KX691573		KX691632	NSAM00038R_Trieste		45.641 N 13.728 E	Trieste	Italy
Aurelia solida		KX691574		KX691633	NSAM00038S_Trieste		45.641 N 13.728 E	Trieste	Italy
Aurelia solida		KX691575		KX691634	NSAM00038V_Trieste		45.641 N 13.728 E	Trieste	Italy
Aurelia solida		KX691576		KX691635	NSAM00038W_Trieste		45.641 N 13.728 E	Trieste	Italy
Aurelia solida		KX691578		KX691636	NSAM00038Y_Trieste		45.641 N 13.728 E	Trieste	Italy
Aurelia solida		KX691579		KX691637	NSAM00038Z_Trieste		45.641 N 13.728 E	Trieste	Italy
Aurelia solida		KX691580		KX691638	NSAM00034Y_PortoCesareo		40.258 N 17.889 E	Porto Cesareo	Italy
Aurelia solida		KX691581		KX691639	NSAM00034Z_PortoCesareo		40.258 N 17.889 E	Porto Cesareo	Italy
Aurelia solida		KX691582		KX691640	NSAM00035A_PortoCesareo		40.258 N 17.889 E	Porto Cesareo	Italy
Aurelia solida		KX691600		KX691649	NSAM00035K_BizerteBay		37.298 N 9.939 E	Bay of Bizerte	Tunisia
Aurelia solida		KX691601		KX691650	NSAM00035L_BizerteBay		37.298 N 9.939 E	Bay of Bizerte	Tunisia
Aurelia solida		KX691603		KX691651	NSAM00035R_BizerteLagoon		37.187 N 9.858 E	Bizerte Lagoon	Tunisia
Aurelia solida		KX691604		KX691652	NSAM00035S_BizerteLagoon		37.187 N 9.858 E	Bizerte Lagoon	Tunisia
Aurelia solida		KX691605		KX691653	NSAM00035T_BizerteLagoon		37.187 N 9.858 E	Bizerte Lagoon	Tunisia
Aurelia solida		KX691606		KX691654	NSAM00035U_BizerteLagoon		37.187 N 9.858 E	Bizerte Lagoon	Tunisia
Aurelia solida		KX691607		KX691655	NSAM00035V_BizerteLagoon		37.187 N 9.858 E	Bizerte Lagoon	Tunisia
Aurelia solida	MZ061785	MZ052178		MZ061832	JL13		45.530 N 13.556 E	Piran	Slovenia
Aurelia solida	MZ061786	MZ052179		MZ061833	JL14		45.547 N 13.722 E	Port of Koper	Slovenia
Aurelia solida	MZ061792	MZ052185		MZ061839	JL20		45.547 N 13.722 E	Port of Koper	Slovenia
Aurelia solida	MZ061793	MZ052186		MZ061840	JL21		29.512 N 34.947 E	Red Sea	Israel
Aurelia solida			AF461407		RS1		20.150 N 38.592 E	Red Sea
Aurelia solida		AY903133	AY935212		North Adriatic2		44.00 N 14.00 E	North Adriatic Sea	Italy
Aurelia solida		AY903134	AY935213		BayofSton1		42.8327 N 17.6986 E	Bay of Ston	Croatia
Aurelia solida		HQ913927	HQ914000		AA1703		45.5143 N 13.5742 E	Gulf of Trieste, North Adriatic Sea	Slovenia
Aurelia solida		HQ913928	HQ914001		AA1704		45.5143 N 13.5742 E	Gulf of Trieste, North Adriatic Sea	Slovenia
Aurelia solida		HQ913929	HQ914002		AA1705		45.5143 N 13.5742 E	Gulf of Trieste, North Adriatic Sea	Slovenia
Aurelia solida		HQ913930	HQ914003		AA1706		45.5143 N 13.5742 E	Gulf of Trieste, North Adriatic Sea	Slovenia
Aurelia solida		HQ913931	HQ914004		AA1707		45.5143 N 13.5742 E	Gulf of Trieste, North Adriatic Sea	Slovenia
Aurelia solida		HQ913932	HQ914005		AA1711		45.5143 N 13.5742 E	Gulf of Trieste, North Adriatic Sea	Slovenia
Aurelia solida		HQ913933	HQ914006		AA1712		45.5143 N 13.5742 E	Gulf of Trieste, North Adriatic Sea	Slovenia
Aurelia solida			HQ914007		AA1725		45.5143 N 13.5742 E	Gulf of Trieste, North Adriatic Sea	Slovenia
Aurelia solida			HQ914008		AA1731		45.5143 N 13.5742 E	Gulf of Trieste, North Adriatic Sea	Slovenia
Aurelia solida	AF461400
Aurelia solida		AY903132			NorthAdriatic1		44.000 N 14.000 E	North Adriatic Sea
Aurelia solida		AY903135			BayofSton2		42.8327 N 17.6986 E	Bay of Ston	Croatia
Aurelia solida		HQ913925			AA1701		45.5143 N 13.5742 E	Gulf of Trieste, North Adriatic Sea	Slovenia
Aurelia solida		HQ913926			AA1702		45.5143 N 13.5742 E	Gulf of Trieste, North Adriatic Sea	Slovenia
Aurelia solida		KX691577			NSAM00038X_Trieste		45.641 N 13.728 E	Trieste	Italy
Aurelia solida		KX691583			NSAM00035B_PortoCesareo		40.258 N 17.889 E	Porto Cesareo	Italy
Aurelia solida		KX691602			NSAM00035Q_BizerteBay		37.298 N 9.939 E	Bay of Bizerte	Tunisia
Aurelia solida		KX691608			NSAM00035X_BizerteLagoon		37.187 N 9.858 E	Bizerte Lagoon	Tunisia
Aurelia solida		KX691609			NSAM00035Y_BizerteLagoon		37.187 N 9.858 E	Bizerte Lagoon	Tunisia
Aurelia solida		KX691610			NSAM00035Z_BizerteLagoon		37.187 N 9.858 E	Bizerte Lagoon	Tunisia
Aurelia sp. 12	KY610665	KY564339		KY610888	M0D006054V_MXBSBAP		24.173437 N 110.315781 W	Baja California Sur, Bahia de La Paz	Mexico
Aurelia sp. 12	KY610667	KY564341		KY610889	M0D006056X_MXBSBAP		24.173437 N 110.315781 W	Baja California Sur, Bahia de La Paz	Mexico
Aurelia sp. 12	KY610666	KY564340		KY610890	M0D006055W_MXBSBAP		24.173437 N 110.315781 W	Baja California Sur, Bahia de La Paz	Mexico
Aurelia sp. 12		KY564342			M0D006057Y_MXBSBAP		24.173437 N 110.315781 W	Baja California Sur, Bahia de La Paz	Mexico
Aurelia sp. 12		KY564343			M0D006058Z_MXBSBAP		24.173437 N 110.315781 W	Baja California Sur, Bahia de La Paz	Mexico
Aurelia sp. 12		KY564344			M0D006068J_MXBSBAP		24.173437 N 110.315781 W	Baja California Sur, Bahia de La Paz	Mexico
Aurelia sp. 12		KY564345			M0D014842V_MXBSBAP		24.173437 N 110.315781 W	Baja California Sur, Bahia de La Paz	Mexico
Aurelia sp. 12		KY564346			M0D006059A_MXBSBAP		24.173437 N 110.315781 W	Baja California Sur, Bahia de La Paz	Mexico
Aurelia sp. 13	KY610668	KY564336		KY610891	M0D020159I_CRGUCUJ		10.956360 N 85.728390 W	Guanacaste, Cuajiniquil	Costa Rica
Aurelia sp. 13	KY610669	KY564335		KY610892	M0D018460Z_NILETRA		12.052363 N 86.706099 W	Leon, El Transito	El Salvador
Aurelia sp. 13	KY610670	KY564330		KY610893	M0D018376T_SVUNESP		13.135220 N 88.196800 W	La Union, El Espino	El Salvador
Aurelia sp. 13		KY564331			M0D018377U_SVUNESP		13.135220 N 88.196800 W	La Union, El Espino	El Salvador
Aurelia sp. 13		KY564332			M0D018379W_SVUNESP		13.135220 N 88.196800 W	La Union, El Espino	El Salvador
Aurelia sp. 13		KY564333			M0D018378V_SVUNESP		13.135220 N 88.196800 W	La Union, El Espino	El Salvador
Aurelia sp. 13		KY564334			M0D020000F_NILETRA		12.052363 N 86.706099 W	Leon, El Transito	Nicaragua
Aurelia sp. 13		KY564337			M0D020160J_CRGUCUJ		10.956360 N 85.728390 W	Guacanaste, Cuajiniquil	Costa Rica
Aurelia sp. 13		KY564338			M0D020161K_CRGUCUJ		10.956360 N 85.728390 W	Guacanaste, Cuajiniquil	Costa Rica
Aurelia sp. 13		MF742093			CRGUCUJ	M0D020162L	10.956360 N 85.728390 W	Guanacaste, Cuajiniquil	Costa Rica
Aurelia sp. 13		MF742094			CRGUCUJ	M0D020163M	10.956360 N 85.728390 W	Guanacaste, Cuajiniquil	Costa Rica
Aurelia sp. 13		MF742095			CRGUCUJ	M0D020164N	10.956360 N 85.728390 W	Guanacaste, Cuajiniquil	Costa Rica
Aurelia sp. 14	KY610662	KY564358		KY610885	M0D014904F_PAPAGPA		8.985814 N 79.492375 W	Gulf of Panama	Panama
Aurelia sp. 14	KY610664	KY564359		KY610886	M0D014906H_PAPAGPA		8.985814 N 79.492375 W	Gulf of Panama	Panama
Aurelia sp. 14	KY610663	KY564360		KY610887	M0D014905G_PAPAGPA		8.985814 N 79.492375 W	Gulf of Panama	Panama
Aurelia sp. 17	KT982712				NO.13-16S		8.862 N 98.259 E	Nam Kem Village, Phang-nga	Thailand
Aurelia sp. 17	KT982713				NO.15-16S		8.862 N 98.259 E	Nam Kem Village, Phang-nga	Thailand
Aurelia sp. 17	KT982714				NO.16-16S		8.862 N 98.259 E	Nam Kem Village, Phang-nga	Thailand
Aurelia sp. 17	KT982715				NO.20-16S		8.862 N 98.259 E	Nam Kem Village, Phang-nga	Thailand
Aurelia sp. 18			MN527964		p1		28.000000 N 89.068889 W	Louisiana	USA
Aurelia sp. 18		MN531715	MN527965		m.7.1.17		28.000000 N 89.068889 W	Louisiana	USA
Aurelia sp. 18			MN527966		m.7.3.17		28.000000 N 89.068889 W	Louisiana	USA
Aurelia sp. 18		MN531714			p.08.11.17.01		28.000000 N 89.068889 W	Louisiana	USA
Aurelia sp. 18		MN531718			p.6.1.19.AF10		28.000000 N 89.068889 W	Louisiana	USA
Aurelia sp. 3			AY319836		CRRF48		7.3384 N 134.4648 E	Palau International Coral Reef Center, Malakal, Koror State	Palau
Aurelia sp. 3		AY903113	AY319837		TKCU13		7.25 N 134.45 E	Tab Kukau Cove, Urukthapel	Palau
Aurelia sp. 3			AY935209		CRRF48		7.3384 N 134.4648 E	Palau International Coral Reef Center, Malakal, Koror State	Palau
Aurelia sp. 3		AY903096			Malakal48		7.3384 N 134.4648 E	Palau International Coral Reef Center, Malakal, Koror State	Palau
Aurelia sp. 3		AY903112			TKCU12		7.25 N 134.45 E	Tab Kukau Cove, Urukthapel	Palau
Aurelia sp. 3		AY903114			TketauLM36		7.1518 N 134.3565 E	Tketau Lake, Mecherchar, Koror State	Palau
Aurelia sp. 3		AY903115			41Risong		7.305 N 134.477 E	Risong Cove, Auluptagel, Koror State	Palau
Aurelia sp. 3		MF742111			IDPWTKC	M0D009046X	7.25 N 134.45 E	Tab Kukau Cove, Urukthapel	Palau
Aurelia sp. 3		MF742112			IDPWTKC	M0D009047Y	7.25 N 134.45 E	Tab Kukau Cove, Urukthapel	Palau
Aurelia sp. 3		MF742113			IDPWTKC	M0D009048Z	7.25 N 134.45 E	Tab Kukau Cove, Urukthapel	Palau
Aurelia sp. 3		MF742124			IDPWTKC	M0D009290H	7.25 N 134.45 E	Tab Kukau Cove, Urukthapel	Palau
Aurelia sp. 7			AY935218		MDJ20_ANZ2		41.283 S 174.783 E	Wellington	New Zealand
Aurelia sp. 7		AY903138			Tasmania1		43.200 S 147.000 E	Tasmania, Huon Estuary	Australia
Aurelia sp. 7		AY903139			Tasmania4		43.200 S 147.000 E	Tasmania, Huon Estuary	Australia
Aurelia sp. 7		AY903140			Tasmania12		43.200 S 147.000 E	Tasmania, Huon Estuary	Australia
Aurelia sp. 7		AY903141			Tasmania15		43.200 S 147.000 E	Tasmania, Huon Estuary	Australia
Aurelia sp. 7		JX948082			AC1		41.1645 S 173.8637 E	Richmond Bay, Pelorus Sound	New Zealand
Aurelia sp. 7		JX948083			AC3		46.9834 S 168.1202 E	Big Glory Bay, Stewart Island	New Zealand
Drymonema dalmatinum	HQ234628	HQ234615		HQ234665	Foca-3	M0D15769L		Foca	Turkey
Drymonema dalmatinum				HQ234666		M0D15771N		Foca	Turkey
Drymonema dalmatinum	HQ234630	HQ234617	HQ234643		Foca-5	M0D15771O		Foca	Turkey
Drymonema dalmatinum			HQ234647		Foca-1	M0D13158B		Foca	Turkey
