# Supplementary material for: The importance of molecular characters when morphological variability hinders diagnosability: systematics of the moon jellyfish genus Aurelia (Cnidaria: Scyphozoa)
Source: PeerJ. 2021 Sep 9;9:e11954. doi: 10.7717/peerj.11954 (PMC8435205; doi:10.7717/peerj.11954)
Supplement: Supplemental Information 12 — Each row represents a terminal within species clades and consists of sequence IDs of each marker that was combined. Species appear in the same order as in the concatenated phylogenetic tree (Fig. 9). The chimerism ratio is the proportion of chimeric sequences (that belong to a different specimen) found in relation to the maximum possible. The completeness ratio is the proportion of sequences present in relation to the maximum possible. For each of these ratios, averages per terminal (row) are presented, as well as the proportion of terminals without chimeras and terminals with a complete sequence set. [file peerj-09-11954-s012.xls]

## Sheet: Table S5
Table S5. Sequence composition of concatenated phylogenetic analysis. Each row represents a terminal within species clades and consists of sequence IDs of each marker that was combined. Species appear in the same order as in the concatenated phylogenetic tree (Fig. 9). The chimerism ratio is the proportion of chimeric sequences (that belong to a different specimen) found in relation to the maximu…
Species (this study)	16S	COI	ITS1	28S	Chimerism ratio	Completeness ratio
Drymonema dalmatinum	Drymonema_dalmatinum1	Drymonema_dalmatinum1	Drymonema_dalmatinum1	Drymonema_dalmatinum1	0.333333	1
	Drymonema_dalmatinum2	Drymonema_dalmatinum2	Drymonema_dalmatinum2	Drymonema_dalmatinum2	0.333333	1
Aurelia ayla sp. nov.	AGC62-Aurelia-Bonaire	AGC62-Aurelia-Bonaire			0	0.5
	AGC70-Aurelia-Bonaire				0	0.25
Aurelia miyakei sp. nov.	AF461404-Aurelia_sp_MCA-Tropical Aquarium Community	AY903213-Aurelia_sp_11-Marshall_Islands	AF461412-Aurelia_sp_MCA-Aquarium		0.5	0.75
	JL30-Aurelia-Thailand	JL30-Aurelia-Thailand	JL30-Aurelia-Thailand	JL30-Aurelia-Thailand	0	1
Aurelia sp. 7		AY903138-Aurelia_sp_7-Australia	AY935218-Aurelia_sp_7-New_Zealand		1	0.5
		AY903139-Aurelia_sp_7-Australia			0	0.25
		AY903140-Aurelia_sp_7-Australia			0	0.25
Aurelia insularia sp. nov.	JL15-Aurelia-Brazil-RJ	JL15-Aurelia-Brazil-RJ		JL15-Aurelia-Brazil-RJ	0	0.75
	JL17-Aurelia-Brazil-SP	JL17-Aurelia-Brazil-SP		JL17-Aurelia-Brazil-SP	0	0.75
	JL35-Aurelia-Brazil-SC		JL35-Aurelia-Brazil-SC	JL35-Aurelia-Brazil-SC	0	0.75
	JL42-Aurelia-Brazil-SC	JL42-Aurelia-Brazil-SC	JL43-Aurelia-Brazil-SC	JL42-Aurelia-Brazil-SC	0	1
Aurelia mianzani sp. nov.	KY610671-Aurelia_sp_16-Argentina	KY564347-Aurelia_sp_16-Argentina		KY610899-Aurelia_sp_16-Argentina	0	0.75
	KY610672-Aurelia_sp_16-Argentina	KY564348-Aurelia_sp_16-Argentina		KY610900-Aurelia_sp_16-Argentina	0	0.75
	KY610673-Aurelia_sp_16-Argentina	KY564349-Aurelia_sp_16-Argentina		KY610901-Aurelia_sp_16-Argentina	0	0.75
	LAB16-Aurelia-Brazil-SP	LAB16-Aurelia-Brazil-SP			0	0.5
Aurelia sp. 12	KY610665-Aurelia_sp_12-Mexico	KY564339-Aurelia_sp_12-Mexico		KY610888-Aurelia_sp_12-Mexico	0	0.75
	KY610666-Aurelia_sp_12-Mexico	KY564340-Aurelia_sp_12-Mexico		KY610889-Aurelia_sp_12-Mexico	0.5	0.75
	KY610667-Aurelia_sp_12-Mexico	KY564341-Aurelia_sp_12-Mexico		KY610890-Aurelia_sp_12-Mexico	0.5	0.75
Aurelia sp. 13	KY610668-Aurelia_sp_13-Costa_Rica	KY564336-Aurelia_sp_13-Costa Rica		KY610891-Aurelia_sp_13-Costa Rica	0	0.75
	KY610669-Aurelia_sp_13-Nicaragua	KY564334-Aurelia_sp_13-Nicaragua		KY610892-Aurelia_sp_13-Nicaragua	0.5	0.75
	KY610670-Aurelia_sp_13-El_Salvador	KY564330-Aurelia_sp_13-El Salvador		KY610893-Aurelia_sp_13-El Salvador	0	0.75
Aurelia rara sp. nov.	AGC18-029-Aurelia-USA-GoM	KU984338-Aurelia_cf_2-USA	KU984376-Aurelia_sp_9-USA		0.5	0.75
	AGC18-044-Aurelia-USA-GoM		KU984377-Aurelia_sp_9-USA		1	0.5
Aurelia marginalis	AGC18-013-Aurelia-USA-GoM	AGC18-013-Aurelia-USA-GoM	KU984414-Aurelia_sp_9-USA	KY610896-Aurelia_sp_9-Mexico	0.666667	1
	AGC18-020-Aurelia-USA-GoM	AGC18-020-Aurelia-USA-GoM	KU984420-Aurelia_sp_9-USA		0.5	0.75
	KY610677-Aurelia_sp_9-Mexico	KY564353-Aurelia_sp_9-Mexico	KU984418-Aurelia_sp_9-USA	KY610894-Aurelia_sp_9-Mexico	0.666667	1
	KY610678-Aurelia_sp_9-Mexico	KY564354-Aurelia_sp_9-Mexico	KU984419-Aurelia_sp_9-USA	KY610895-Aurelia_sp_9-Mexico	0.666667	1
Aurelia montyi sp. nov.	AGC18-024-Aurelia-USA-GoM	AGC18-024-Aurelia-USA-GoM	KU984364-Aurelia_cf_2-USA		0.5	0.75
	AGC18-026-Aurelia-USA-GoM	AGC18-026-Aurelia-USA-GoM	KU984365-Aurelia_cf_2-USA		0.5	0.75
	AGC18-027-Aurelia-USA-GoM	AGC18-027-Aurelia-USA-GoM	KU984366-Aurelia_cf_2-USA		0.5	0.75
Aurelia smithsoniana sp. nov.	JL36-Aurelia-Panama-Caribbean	JL36-Aurelia-Panama-Caribbean			0	0.5
	KY610674-Aurelia_sp_15-Panama	KY564350-Aurelia_sp_15-Panama		KY610897-Aurelia_sp_15-Panama	0.5	0.75
	KY610675-Aurelia_sp_15-Panama	KY564351-Aurelia_sp_15-Panama		KY610898-Aurelia_sp_15-Panama	0.5	0.75
Aurelia cebimarensis sp. nov.	JL6-Aurelia-Brazil-SP	JL6-Aurelia-Brazil-SP	AY319850-Aurelia_sp_2-Brazil-SP	JL6-Aurelia-Brazil-SP	0.333333	1
	JL41-Aurelia-Brazil-SE	JL41-Aurelia-Brazil-SE	AY319851-Aurelia_sp_2-Brazil-SP	JL41-Aurelia-Brazil-SE	0.333333	1
	JL11-Aurelia-Brazil-SP	JL11-Aurelia-Brazil-SP		JL11-Aurelia-Brazil-SP	0	0.75
Aurelia sp. 17	KT982712-Aurelia_sp-Thailand				0	0.25
	KT982713-Aurelia_sp-Thailand				0	0.25
	KT982714-Aurelia_sp-Thailand				0	0.25
Aurelia sp. 14	KY610662-Aurelia_sp_14-Panama	KY564358-Aurelia_sp_14-Panama		KY610885-Aurelia_sp_14-Panama	0	0.75
	KY610663-Aurelia_sp_14-Panama	KY564359-Aurelia_sp_14-Panama		KY610886-Aurelia_sp_14-Panama	0.5	0.75
	KY610664-Aurelia_sp_14-Panama	KY564360-Aurelia_sp_14-Panama		KY610887-Aurelia_sp_14-Panama	0.5	0.75
Aurelia cf. malayensis		AY903111-Aurelia_sp_4-Palau			0	0.25
Aurelia malayensis sp. nov.	JL29-Aurelia-Philippines	JL29-Aurelia-Philippines	AY319834-Aurelia_sp_4-Palau	JL29-Aurelia-Philippines	0.333333	1
	JL31-Aurelia-Japan	JL31-Aurelia-Japan	AY319835-Aurelia_sp_4-Palau	JL31-Aurelia-Japan	0.333333	1
	JL32-Aurelia-Philippines	JL32-Aurelia-Philippines		JL32-Aurelia-Philippines	0	0.75
Aurelia sp. 3		AY903096-Aurelia_sp_3-Palau	AY319836-Aurelia_sp_3-Palau		1	0.5
		AY903112-Aurelia_sp_3-Palau	AY319837-Aurelia_sp_3-Palau		1	0.5
		MF742111-Aurelia_sp_3-Palau	AY935209-Aurelia_sp_3-Palau		1	0.5
Aurelia clausa		AY903129-Aurelia_sp_6-Papua_New_Guinea	AY319839-Aurelia_sp_6-Palau		1	0.5
		MF742114-Aurelia_sp_6-Palau	AY935207-Aurelia_sp_6-Palau		1	0.5
Aurelia dubia	AF461402-Aurelia_sp_ARAB-Arabian_Peninsula		AF461410-Aurelia_sp_ARAB-Arabian_Peninsula		0	0.5
Aurelia cf. dubia	KP144282-Aurelia_aurita-Israel_Red				0	0.25
Aurelia solida	JL14-Aurelia-Slovenia	JL14-Aurelia-Slovenia	AY935212-Aurelia_sp_8-Italy	JL14-Aurelia-Slovenia	0.333333	1
	JL20-Aurelia-Slovenia	JL20-Aurelia-Slovenia	HQ914001-Aurelia_sp-Slovenia	JL20-Aurelia-Slovenia	0.333333	1
	JL21-Aurelia-Red_Sea	JL21-Aurelia-Red_Sea	HQ914000-Aurelia_sp-Slovenia	JL21-Aurelia-Red_Sea	0.333333	1
Aurelia labiata	AGC18-048-Aurelia-1-Alaska	AGC18-048-Aurelia-1-Alaska			0	0.5
	AGC18-049-Aurelia-1-Alaska	AGC18-049-Aurelia-1-Alaska			0	0.5
Aurelia columbia sp. nov.	UF12778-Aurelia-Washington-USA	UF12778-Aurelia-Washington-USA			0	0.5
		AY903068-Aurelia_labiata-2-Canada	AY319843-Aurelia_labiata-Canada		0	0.5
		AY903069-Aurelia_labiata-2-Canada	AY319844-Aurelia_labiata-Canada		0	0.5
Aurelia relicta	AGC18-006-Aurelia-Croatia	AGC18-006-Aurelia-Croatia	HQ914012-Aurelia_sp-Croatia	KX691625-Aurelia_relicta-Croatia	0.666667	1
	AGC18-007-Aurelia-Croatia	AGC18-007-Aurelia-Croatia	HQ914010-Aurelia_sp-Croatia	KX691623-Aurelia_relicta-Croatia	0.666667	1
	AGC18-010-Aurelia-Croatia	AGC18-010-Aurelia-Croatia	HQ914009-Aurelia_sp-Croatia	KX691624-Aurelia_relicta-Croatia	0.666667	1
Aurelia persea	HG964643-Aurelia_sp_GAM-Israel_Med	HG964641-Aurelia_sp-Israel		HG964639-Aurelia_sp-Israel_Med	0	0.75
Aurelia sp. 18		MN531714-Aurelia_sp_new-USA-GoM	MN527964-Aurelia_sp_new-USA-GoM		1	0.5
		MN531715-Aurelia_sp_new-USA-GoM	MN527965-Aurelia_sp_new-USA-GoM		0	0.5
		MN531718-Aurelia_sp_new-USA-GoM	MN527966-Aurelia_sp_new-USA-GoM		1	0.5
Aurelia aurita	A98S-Aurelia-Ushuaia	A98S-Aurelia-Ushuaia	A98S-Aurelia-Ushuaia	A98S-Aurelia-Ushuaia	0	1
	JL8-Aurelia-Helgoland	JL8-Aurelia-Helgoland	JL8-Aurelia-Helgoland	JL8-Aurelia-Helgoland	0	1
	KY610660-Aurelia_aurita-Chile	KY564361-Aurelia_aurita-Chile	HQ913992-Aurelia_sp-Germany	KY610884-Aurelia_aurita-Chile	0.333333	1
	KY610661-Aurelia_aurita-Norway	AY903118-Aurelia_aurita-Sweden	AY935206-Aurelia_aurita-Norway	HM194866-Aurelia_aurita-Norway	0.666667	1
Aurelia coerulea	JL19-Aurelia-Japan	JL19-Aurelia-Japan	AY935214-Aurelia_sp_1-Japan	JL19-Aurelia-Japan	0.333333	1
	JL22-Aurelia-France-Atlantic	JL22-Aurelia-France-Atlantic	KC767900-Aurelia_aurita-France	JL22-Aurelia-France-Atlantic	0.333333	1
	JL39-Aurelia-Spain-Mediterranean	JL39-Aurelia-Spain-Mediterranean	KR338968-Aurelia_sp-China	JL39-Aurelia-Spain-Mediterranean	0.333333	1
	KF962395-Aurelia_sp_1-China	KF962063-Aurelia_sp_1-China	EU332744-Aurelia_sp-South_Korea	KX691641-Aurelia_coerulea-Spain	1	1
Aurelia cf. coerulea		KP033138-Aurelia_aurita-India			0	0.25
Aurelia limbata	AB720914-Aurelia limbata	AY903189-Aurelia_limbata-Japan	KX943298-Aurelia_limbata-South_Korea		1	0.75
	JL25-Aurelia_limbata-Culture-Japan	JL25-Aurelia_limbata-Culture-Japan	JL25-Aurelia_limbata-Culture-Japan	JL25-Aurelia_limbata-Culture-Japan	0	1
	JL38-Aurelia_limbata-KamoAquarium-Japan	JL38-Aurelia_limbata-KamoAquarium-Japan	JL38-Aurelia_limbata-KamoAquarium-Japan		0	0.75
Aurelia hyalina	GR10-051.1-Aurelia-Greenland	GR10-051.1-Aurelia-Greenland			0	0.5
	GR10-055.1-Aurelia-Greenland	GR10-055.1-Aurelia-Greenland			0	0.5
	RU085-Aurelia-Arctic	RU085-Aurelia-Arctic			0	0.5
		AY903067-Aurelia_sp_10-USA	AY935211-Aurelia_sp_10-USA_Alaska		0	0.5
				Average per terminal (row)	0.30814	0.706395
				Proportion of no-chimerism and complete terminals, respectively	0.488372	0.302326
