# Supplementary material for: The importance of molecular characters when morphological variability hinders diagnosability: systematics of the moon jellyfish genus Aurelia (Cnidaria: Scyphozoa)
Source: PeerJ. 2021 Sep 9;9:e11954. doi: 10.7717/peerj.11954 (PMC8435205; doi:10.7717/peerj.11954)
Supplement: Supplemental Information 13 — These are based on the tree and alignment of each marker (see Table S4 for details on sequences used and Figs S4-S7 for single-marker phylogenies). Synapomorphies appear with the alignment position below them (starting at 0, not 1) and are color-coded: in white are ambiguous and other colors are unambiguous, with black as unique and non-homoplastic, red as unique and homoplastic, and blue as non-unique and homoplastic (see further details in Machado, 2015). Columns with an "n" represent counts of each color-coded synapomorphy and "N" represents the total number of synapomorphies for each marker. Synapomorphies are absent when there were no sequences of the marker for a species, or when the species was not monophyletic for the marker (specified). Species names appear as terminals of the concatenated phylogeny (Fig. 9). [file peerj-09-11954-s013.xlsx]

## Sheet: Table S6
Table S6. Diagnostic molecular characters of each marker for each species hypothesis. These are based on the tree and alignment of each marker (see Table S4 for details on sequences used and Figs S4-S7 for single-marker phylogenies). Synapomorphies appear with the alignment position below them (starting at 0, not 1) and are color-coded: in white are ambiguous and other colors are unambiguous, wit…
		16S						COI						ITS1						28S
		n	n	n	n	N	Diagnostis	n	n	n	n	N	Diagnosis	n	n	n	n	N	Diagnosis	n	n	n	n	N	Diagnosis
	Aurelia ayla sp. nov.	0	15	5	0	20		2	1	17	0	20		Absent						Absent
	Aurelia miyakei sp. nov.	0	6	11	0	17		0	0	20	0	20		0	14	6	0	20		1	7	9	0	17
	Aurelia sp. 7	Absent						0	2	18	0	20		2	15	3	0	20		Absent
	Aurelia insularia sp. nov.	0	12	8	0	20		1	3	16	0	20		0	18	2	0	20		0	2	9	0	11
	Aurelia mianzani sp. nov.	1	4	5	0	10		2	0	17	0	19		Absent						0	4	1	0	5
	Aurelia sp. 12	0	7	10	0	17		0	3	17	0	20		Not monophyletic						Not monophyletic
	Aurelia sp. 13	0	2	11	0	13		0	1	19	0	20		Not monophyletic						0	1	1	0	2
	Aurelia rara sp. nov.	0	2	4	0	6		0	0	18	0	18		Not monophyletic						Absent
	Aurelia marginalis	Not monophyletic						0	1	18	1	20		Not monophyletic						0	1	2	0	3
	Aurelia montyi sp. nov.	0	1	4	0	5		0	1	10	0	11		0	2	4	0	6		Absent
	Aurelia smithsoniana sp. nov.	1	3	6	0	10		0	0	7	0	7		Absent						Not monophyletic
	Aurelia cebimarensis sp. nov.	1	2	2	0	5		0	0	4	0	4		0	15	1	0	16		Not monophyletic
	Aurelia sp. 17	0	6	11	0	17		Absent						Absent						Absent
	Aurelia sp. 14	1	6	13	0	20		0	2	18	0	20		Absent						0	0	2	0	2
	Aurelia malayensis sp. nov.	0	9	11	0	20		0	0	17	0	17		2	9	7	0	18		1	2	1	0	4
	Aurelia sp. 3	Absent						1	2	17	0	20		0	17	3	0	20		Absent
	Aurelia clausa	Absent						0	0	20	0	20		3	10	7	0	20		Absent
	Aurelia dubia	1	1	6	0	8		Absent						0	13	7	0	20		Absent
	Aurelia solida	0	1	8	1	10		0	0	20	0	20		2	10	7	1	20		0	1	2	0	3
	Aurelia labiata	Not monophyletic						0	0	13	0	13		Absent (A. cf. labiata)						Absent
	Aurelia columbia sp. nov.	Absent						0	0	16	0	16		Not monophyletic						Absent
	Aurelia relicta	0	2	6	0	8		0	1	15	0	16		0	8	12	0	20		0	2	0	0	2
	Aurelia persea	1	3	9	0	13		2	0	18	0	20		Absent						0	1	2	0	3
	Aurelia sp. 18	Absent						0	0	19	0	19		2	11	7	0	20		Absent
	Aurelia aurita	0	0	0	5	5		0	0	7	13	20		0	4	0	16	20		0	4	0	8	12
	Aurelia coerulea	1	3	10	1	15		0	0	18	2	20		0	17	1	0	18		0	1	0	0	1
	Aurelia limbata	0	1	2	0	3		2	1	17	0	20		0	12	6	1	19		0	0	6	0	6
	Aurelia hyalina	Not monophyletic						0	0	12	0	12		0	8	11	0	19		Absent
Average synampomorphies per marker		0.35	4.3	7.1	0.35	12.1		0.384615	0.692308	15.6923	0.615385	17.3846		0.6875	11.4375	5.25	1.125	18.5		0.153846	2	2.69231	0.615385	5.46154
