# Supplementary material for: The importance of molecular characters when morphological variability hinders diagnosability: systematics of the moon jellyfish genus Aurelia (Cnidaria: Scyphozoa)
Source: PeerJ. 2021 Sep 9;9:e11954. doi: 10.7717/peerj.11954 (PMC8435205; doi:10.7717/peerj.11954)
Supplement: Supplemental Information 14 — Column "n" presents the number of sequences used to define ranges of intra- and interspecific distances (reported as minimum - maximum). Intraspecific distances appear in bold and COI interspecific distances that fall below 10% appear highlighted in yellow. Species names appear as terminals of the concatenated phylogeny (Fig. 9). [file peerj-09-11954-s014.xlsx]

## Sheet: Table S7
Table S7. Uncorrected pairwise distances (%) from 16S, COI, ITS1 and 28S alignments. Column "n" presents the number of sequences used to define ranges of intra- and interspecific distances (reported as minimum - maximum). Intraspecific distances appear in bold and COI interspecific distances that fall below 10% appear highlighted in yellow. Species names appear as terminals of the concatenated ph…
		n	Marker	A. ayla sp. nov.	A. miyakei sp. nov.	A. sp. 7	A. insularia sp. nov.	A. mianzani sp. nov.	A. sp. 12	A. sp. 13	A. rara sp. nov.	A. marginalis	A. montyi sp. nov.	A. smithsoniana sp. nov.	A. cebimarensis sp. nov.	A. sp. 17	A. sp. 14	A. malayensis sp. nov.	A. sp. 3	A. clausa	A. dubia	A. solida	A. labiata	A. columbia sp. nov.	A. relicta	A. persea	A. sp. 18	A. aurita	A. coerulea	A. limbata	A. hyalina
	Aurelia ayla sp. nov.	2	16S	0
		1	COI	NA
		-	ITS1	-
		-	28S	-
	Aurelia miyakei sp. nov.	2	16S	26.8 - 26.8	0.3
		2	COI	21.5 - 21.6	2.5
		2	ITS1	-	2.1
		1	28S	-	NA
	Aurelia sp. 7	-	16S	-	-	-
		6	COI	18.9 - 19.3	18.5 - 19.6	0 - 0.5
		1	ITS1	-	45.9 - 47	NA
		-	28S	-	-	-
	Aurelia insularia sp. nov.	9	16S	25.4 - 26.3	19 - 21.1	-	0 - 3.2
		3	COI	18.2 - 18.5	21.5 - 22.5	15.2 - 16.9	0.2 - 1.9
		1	ITS1	-	53.4 - 54.3	37.9 - 37.9	0
		7	28S	-	5.9 - 5.9	-	0
	Aurelia mianzani sp. nov.	4	16S	29.3 - 29.3	18.1 - 18.1	-	25 - 26.9	0
		5	COI	22.7 - 22.9	18.8 - 19.1	18.5 - 19.5	22.7 - 23.5	0 - 0.3
		-	ITS1	-	-	-	-	-
		3	28S	-	9.5 - 9.5	-	9.1 - 9.1	0
	Aurelia sp. 12	3	16S	29.6 - 29.9	18.7 - 19.2	-	25.1 - 27.2	9.4 - 9.6	0 - 0.3
		8	COI	22 - 22.4	20.2 - 20.5	21.8 - 23	23 - 24	14.2 - 15.4	0 - 0.3
		-	ITS1	-	-	-	-	-	-
		3	28S	-	8.9 - 9.3	-	8.5 - 8.9	1.8 - 2	0.6 - 1
	Aurelia sp. 13	3	16S	29.4 - 29.6	17.2 - 17.7	-	23.8 - 25.9	8.6 - 8.9	8.9 - 9.7	0.3 - 0.5
		12	COI	20.8 - 21.3	20.3 - 21	19.5 - 20.5	21.5 - 22.9	15.8 - 16.5	14 - 15	0 - 1
		-	ITS1	-	-	-	-	-	-	-
		3	28S	-	9.3 - 9.5	-	8.9 - 9.1	1.8 - 2	0.8 - 1.2	0 - 0.2
	Aurelia rara sp. nov.	2	16S	27.7 - 27.9	17.7 - 17.9	-	23.6 - 24.9	11.4 - 11.6	12.4 - 13.5	12.7 - 13.2	0.8
		1	COI	21.5 - 21.5	21.2 - 22.1	20 - 20.7	21.1 - 21.8	16.5 - 16.7	16.8 - 17	17.2 - 17.7	NA
		2	ITS1	-	63.8 - 64.4	53.6 - 54	48.5 - 48.9	-	-	-	1
		-	28S	-	-	-	-	-	-	-	-
	Aurelia marginalis	24	16S	28.6 - 28.9	16.2 - 16.9	-	24.1 - 25.7	9.4 - 9.9	12.2 - 12.9	11.2 - 11.9	3.3 - 3.8	0 - 0.5
		48	COI	18.6 - 20.7	18.2 - 21.6	18.1 - 21.1	16.1 - 21.3	16.7 - 18.7	17.8 - 19.3	16.4 - 19.4	8.5 - 9.8	0 - 1
		34	ITS1	-	61.6 - 64.8	51.2 - 54.6	45.9 - 49.6	-	-	-	0 - 9.8	0 - 10.9
		3	28S	-	9.7 - 9.9	-	9.3 - 9.5	1.8 - 2.6	2 - 2.6	2 - 2.6	-	0.6 - 0.8
	Aurelia montyi sp. nov.	7	16S	27.7 - 28.4	17.7 - 18.2	-	24.1 - 25.7	11.4 - 12.2	14.5 - 15.5	12.7 - 13.5	4.6 - 5.6	3.8 - 4.8	0 - 0.8
		17	COI	20.5 - 21.2	19.1 - 21.1	21 - 22.2	19.2 - 22.8	17 - 18.2	15.7 - 17.5	15.7 - 17.7	11.5 - 12.2	10.5 - 14.4	0 - 0.9
		25	ITS1	-	60.5 - 61.7	49.7 - 50.8	45 - 45.9	-	-	-	18 - 20	14.7 - 21	0 - 4
		-	28S	-	-	-	-	-	-	-	-	-	-
	Aurelia smithsoniana sp. nov.	3	16S	28.9 - 28.9	17.9 - 17.9	-	25.1 - 26.2	12.4 - 12.4	15.7 - 16	15.5 - 15.7	8.1 - 8.4	7.6 - 8.1	6.4 - 6.9	0
		4	COI	23.2 - 23.8	19.8 - 20.1	20.7 - 21.6	21.2 - 22.5	16.5 - 17	16.2 - 16.8	18 - 18.8	10.3 - 10.5	11.6 - 16.6	11 - 12.6	0 - 0.7
		-	ITS1	-	-	-	-	-	-	-	-	-	-	-
		2	28S	-	9.7 - 9.9	-	9.3 - 9.5	2.4 - 2.6	2 - 2.6	2 - 2.4	-	2 - 2.4	-	0.2 - 0.2
	Aurelia cebimarensis sp. nov.	9	16S	29.4 - 29.6	18.7 - 19.2	-	25.8 - 27.2	13.4 - 13.7	16.2 - 16.8	15.5 - 16	6.6 - 7.1	6.4 - 6.9	5.3 - 6.1	3.8 - 4.1	0 - 0.3
		11	COI	22 - 22.6	19.4 - 20.3	20.9 - 22.5	21.5 - 22.5	16 - 17	16 - 17	17.7 - 19.2	9.6 - 10.7	11.2 - 16	10.2 - 12	2 - 3.1	0 - 0.5
		2	ITS1	-	61.7 - 62.3	51 - 51.5	46.4 - 46.9	-	-	-	20.3 - 21.8	15.8 - 22.7	6.3 - 9	-	1.1
		7	28S	-	9.9 - 10.2	-	9.5 - 9.8	2.4 - 2.7	2 - 2.7	2 - 2.5	-	2 - 2.7	-	0 - 0.5	0 - 0.3
	Aurelia sp. 17	4	16S	25.9 - 25.9	16.9 - 17.1	-	18.7 - 19.6	20 - 20	20.6	19 - 19.3	18.3 - 18.5	18.3 - 18.8	18 - 18.8	19.8 - 19.8	20.6 - 20.8	0
		-	COI	-	-	-	-	-	-	-	-	-	-	-	-	-
		-	ITS1	-	-	-	-	-	-	-	-	-	-	-	-	-
		-	28S	-	-	-	-	-	-	-	-	-	-	-	-	-
	Aurelia sp. 14	3	16S	27.1 - 27.9	16.7 - 17.4	-	20 - 21.6	20.6 - 20.8	21.1 - 21.9	20.4 - 20.9	22.6 - 23.1	20.9 - 21.9	21.4 - 22.6	21.1 - 22.4	22.6 - 23.6	13.9 - 14.4	0.8 - 2
		3	COI	18.6 - 19.3	17.3 - 18.5	13.5 - 14.9	16.3 - 17.9	18.8 - 19.3	21.2 - 21.8	20.3 - 21.7	21.2 - 21.3	16.1 - 20	20.8 - 22.6	20.7 - 21	20.5 - 21.4	-	0.8 - 1
		-	ITS1	-	-	-	-	-	-	-	-	-	-	-	-	-	-
		3	28S	-	5.3 - 5.3	-	3.1 - 3.1	8.3 - 8.3	7.7 - 8.1	8.1 - 8.3	-	8.1 - 8.3	-	8.5 - 8.7	8.7 - 9	-	0
	Aurelia malayensis sp. nov.	3	16S	28.5 - 28.8	18.2 - 18.5	-	21.3 - 22.5	22.6 - 22.6	22.9 - 23.2	20.7 - 21.1	21.6 - 22.2	21.4 - 22.2	21.4 - 22.2	23.9 - 23.9	23.9 - 24.4	13.6 - 13.9	12.8 - 13.9	0 - 1.3
		38	COI	19.1 - 19.9	18.5 - 19.8	14.3 - 15.4	15 - 17	20.8 - 21.8	21.3 - 22.9	20.7 - 21.8	19.8 - 22.2	19.1 - 23	20.8 - 23.2	21 - 22.1	20.9 - 23.2	-	15.8 - 16.8	0 - 2.1
		3	ITS1	-	41.5 - 42.7	32.7 - 32.9	45 - 45.2	-	-	-	56.7 - 57.3	55 - 57.8	52.5 - 53.7	-	54.5 - 55.2	-	-	0 - 0.2
		3	28S	-	5.4 - 5.6	-	3.6 - 3.9	8.8 - 9.1	8.2 - 8.9	8.6 - 9.1	-	8.6 - 9.1	-	9 - 9.5	9.2 - 9.8	-	2.1 - 2.3	0.1 - 0.3
	Aurelia sp. 3	-	16S	-	-	-	-	-	-	-	-	-	-	-	-	-	-	-	-
		9	COI	19.8 - 20.5	14.5 - 16.4	15.8 - 17.3	18.5 - 20.5	20.3 - 21.2	21.7 - 22.7	19.7 - 21	22.2 - 23.1	20.1 - 23.1	20.7 - 22.6	21.2 - 22.5	21.3 - 23.6	-	14.2 - 15.9	14.7 - 16.2	0 - 1.4
		3	ITS1	-	46.2 - 48	37.6 - 38.1	49.4 - 49.6	-	-	-	61.5 - 62.3	59.9 - 62.7	57.7 - 59.2	-	59.6 - 60.5	-	-	21.6 - 22.7	0 - 1.8
		-	28S	-	-	-	-	-	-	-	-	-	-	-	-	-	-	-	-
	Aurelia clausa	-	16S	-	-	-	-	-	-	-	-	-	-	-	-	-	-	-	-	-
		19	COI	17.7 - 19	17.5 - 19.6	13.8 - 15.9	17.2 - 20.3	18 - 20.1	20.8 - 22.3	19.5 - 21.7	20.3 - 21.7	16.9 - 21.8	20.7 - 23	19.1 - 21	18.2 - 21.4	-	12.3 - 15.1	15.1 - 18.3	13.9 - 16.3	0 - 4.4
		2	ITS1	-	46.5 - 47.6	39.4 - 39.4	50.2 - 50.2	-	-	-	61.7 - 62	60.1 - 62.4	57.7 - 58.8	-	59.8 - 60.2	-	-	25.3 - 25.5	24.6 - 24.6	0.2
		-	28S	-	-	-	-	-	-	-	-	-	-	-	-	-	-	-	-	-
	Aurelia dubia	1	16S	25 - 25	13.4 - 13.4	-	17.3 - 18.2	19.3 - 19.3	20.4 - 20.7	18.9 - 19.1	18.1 - 18.4	18.1 - 18.6	18.4 - 18.9	19.1 - 19.1	20.9 - 21.2	10.6 - 10.6	12.7 - 13.2	13.8 - 13.9	-	-	NA
		-	COI	-	-	-	-	-	-	-	-	-	-	-	-	-	-	-	-	-	-
		1	ITS1	-	48.2 - 49.3	42.1 - 42.1	50.4 - 50.4	-	-	-	62.5 - 62.8	60.9 - 63.2	58.7 - 59.9	-	60.9 - 61.3	-	-	29.1 - 29.3	27.8 - 27.8	20.6 - 20.6	NA
		-	28S	-	-	-	-	-	-	-	-	-	-	-	-	-	-	-	-	-	-
	Aurelia solida	5	16S	27 - 27.2	15.2 - 15.7	-	19.5 - 20.7	19.3 - 19.6	20.2 - 20.7	18.9 - 19.4	19.9 - 20.7	19.4 - 20.2	18.6 - 19.1	17.6 - 17.9	18.9 - 19.1	12.7 - 12.9	13.7 - 14.5	15.6 - 15.9	-	-	12.5 - 12.7	0 - 1
		40	COI	20.8 - 22.4	18 - 19.5	16.5 - 18.1	18.7 - 20.7	20.5 - 21.9	19.8 - 21.3	18.9 - 20.5	20.2 - 21.7	17.1 - 21.7	19.8 - 22	20.2 - 21.5	20 - 22.1	-	17 - 18.3	18.3 - 21.3	17.8 - 19	16.9 - 19.6	-	0 - 2.8
		12	ITS1	-	53.7 - 55.6	48.6 - 50.4	57.7 - 58.9	-	-	-	66.7 - 67.8	65.4 - 68.2	63.4 - 65.3	-	65.3 - 66.6	-	-	41.1 - 43.4	40.1 - 42.3	32.6 - 35.2	30.2 - 32.5	0 - 6.4
		21	28S	-	5.7 - 6.3	-	3.9 - 4.5	9.1 - 9.7	8.5 - 9.5	8.9 - 9.7	-	8.9 - 9.7	-	9.3 - 10.1	9.5 - 10.4	-	1.4 - 2	2.5 - 3.4	-	-	-	0 - 0.8
	Aurelia labiata	2	16S	26.2 - 26.5	13.7 - 14.2	-	18.5 - 20.2	18.8 - 19.1	19.4 - 19.9	17.1 - 17.6	17.9 - 18.4	16.9 - 17.6	17.6 - 18.6	17.9 - 18.1	17.9 - 18.4	11.9 - 12.2	11.7 - 13.2	14.8 - 15.9	-	-	9.4 - 9.7	9.7 - 10.2	0.8
		12	COI	19.3 - 21.7	17.9 - 19.1	13.6 - 15.5	15.7 - 18.4	20.2 - 21.6	22.2 - 23.2	19.6 - 21.4	19.3 - 22.4	19.1 - 22.5	20.7 - 23	17.7 - 21	17.7 - 21.2	-	16 - 17.7	14.6 - 18.7	15.7 - 18.1	14.8 - 18.5	-	14.4 - 18.2	0 - 1.4
		-	ITS1	-	-	-	-	-	-	-	-	-	-	-	-	-	-	-	-	-	-	-	-
		-	28S	-	-	-	-	-	-	-	-	-	-	-	-	-	-	-	-	-	-	-	-
	Aurelia columbia sp. nov.	1	16S	25.7 - 25.7	14.2 - 14.4	-	18.3 - 19.7	19.6 - 19.6	20.4 - 20.7	17.9 - 18.1	18.6 - 18.9	17.9 - 18.4	18.1 - 18.6	18.6 - 18.6	18.6 - 18.9	13.2 - 13.2	12.4 - 13.2	15.3 - 15.4	-	-	9.7 - 9.7	9.2 - 9.4	1.5 - 2.3	NA
		19	COI	16.9 - 19.6	16.4 - 18.5	14.2 - 17	14.2 - 19.1	19.1 - 21.3	20.8 - 23.5	19.1 - 21.3	19.1 - 21.5	18 - 22.1	16.9 - 20.7	18 - 21	18 - 21.4	-	14.2 - 17.7	13.5 - 19.2	13.7 - 18.3	13.1 - 18.3	-	13.1 - 17.4	6.2 - 8.1	0 - 1.2
		2	ITS1	-	56 - 56.7	53.5 - 53.7	61.4 - 61.8	-	-	-	69.2 - 69.6	68 - 69.9	66.1 - 67.3	-	68.1 - 68.5	-	-	46 - 46.7	47 - 48	40.3 - 40.4	38.9 - 39.6	29.4 - 33.2	-	4.4
		-	28S	-	-	-	-	-	-	-	-	-	-	-	-	-	-	-	-	-	-	-	-	-
	Aurelia relicta	6	16S	27 - 27	16.1 - 16.8	-	18.7 - 20	19.7 - 19.7	19 - 19.2	19 - 19.2	20.2 - 20.2	20 - 20.5	19.7 - 20	20 - 20	21.5 - 21.7	13.8 - 13.8	15.1 - 15.9	17 - 17.7	-	-	12.1 - 12.6	11.1 - 11.9	12.1 - 12.1	11.6 - 12.1	0 - 0.5
		22	COI	15.8 - 18.7	16.9 - 18.5	13.1 - 15	15.3 - 18.5	20.4 - 22.7	21.5 - 22.7	19.6 - 21.2	21.3 - 22.1	18.4 - 21.3	20.6 - 22.9	22.5	22 - 23.9	-	14.2 - 17.6	16.3 - 20.2	15.3 - 17.4	15.6 - 19.5	-	15.6 - 19	17.2 - 20.1	12.1 - 21.4	0 - 0.7
		6	ITS1	-	55.6 - 56.6	56 - 56.8	61.5 - 62	-	-	-	69.1 - 69.7	68 - 70	65.7 - 66.9	-	67.5 - 68.2	-	-	48.7 - 49.1	49.6 - 50.3	43 - 43.5	42.4 - 43.4	34.6 - 37.1	-	31.3 - 32.2	0 - 2.7
		8	28S	-	6 - 7.4	-	5.5 - 7.1	8.7 - 10.3	8.1 - 10.1	8.5 - 10.3	-	8.7 - 10.7	-	8.9 - 10.7	9.1 - 11	-	3.6 - 5.5	3.4 - 5.6	-	-	-	4.5 - 6.9	-	-	0 - 2.8
	Aurelia persea	1	16S	27.7 - 27.7	17.3 - 17.3	-	20.6 - 21.8	20.7 - 20.7	20.2 - 20.5	19.5 - 19.7	21.2 - 21.5	20.7 - 21.2	20.7 - 21	20.7 - 20.7	22 - 22.2	13.8 - 13.8	15.4 - 16.1	18 - 18.2	-	-	13.4 - 13.4	12.6 - 12.9	12.9 - 13.4	12.9 - 12.9	5.6 - 6.1	NA
		1	COI	20.120.1	19.7 - 20.6	17.5 - 17.7	18.5 - 19.4	20.8 - 21.2	19.2 - 19.2	19 - 19.5	22.7 - 22.7	19.8 - 22.3	19.8 - 21.1	21.5 - 21.7	21.3 - 22.2	-	18.2 - 18.7	18 - 18.8	18.5 - 19.3	18.1 - 19.8	-	17.3 - 18.5	19.3 - 20.4	18.6 - 20.7	10.4 - 12.5	NA
		-	ITS1	-	-	-	-	-	-	-	-	-	-	-	-	-	-	-	-	-	-	-	-	-	-	-
		1	28S	-	5.9 - 5.9	-	5.3 - 5.3	8.5 - 8.5	7.9 - 8.3	8.3 - 8.5	-	8.7 - 8.9	-	8.7 - 8.9	8.9 - 9.2	-	3.3 - 3.3	3.9 - 4.2	-	-	-	4.1 - 4.7	-	-	1.4 - 3.2	NA
	Aurelia sp. 18	-	16S	-	-	-	-	-	-	-	-	-	-	-	-	-	-	-	-	-	-	-	-	-	-	-	-
		3	COI	18.9 - 19.1	18.5 - 18.8	16.8 - 17.3	16.5 - 18.6	19.9 - 20.3	20.7 - 21	19.5 - 20.1	22.2 - 22.5	19.3 - 21.4	21.2 - 22.4	21.2 - 21.6	20.9 - 21.6	-	19.5 - 20.2	17.5 - 18.6	16.6 - 17.8	16.9 - 18	-	16.6 - 18.4	17.5 - 18.5	16.9 - 19.2	8.7 - 10	10.4 - 10.7	0 - 0.2
		3	ITS1	-	56.6 - 57	56.4 - 56.7	62.8 - 63	-	-	-	70.3 - 70.8	68.7 - 71.1	67.7 - 68.8	-	69.5 - 70	-	-	48.6 - 49.1	48.8 - 49.6	41.5 - 41.8	42.1 - 42.4	31.2 - 34.2	-	26 - 27.5	21.8 - 22.4	-	0 - 1
		-	28S	-	-	-	-	-	-	-	-	-	-	-	-	-	-	-	-	-	-	-	-	-	-	-	-
	Aurelia aurita	9	16S	25.2 - 25.9	14.1 - 14.9	-	17.7 - 19.6	18.8 - 19.3	17.6 - 18.3	18.1 - 18.6	17.6 - 18.3	17.8 - 18.8	18.1 - 18.8	17.3 - 17.8	18.6 - 19.3	11.6 - 12.6	14.4 - 16.2	16 - 17.6	-	-	10.2 - 11.2	7.4 - 8.6	10.2 - 10.9	9.6 - 10.2	7.6 - 8.9	9.1 - 9.9	-	0 - 1.8
		275	COI	18.2 - 20	16.5 - 18.8	13.5 - 15.9	15.9 - 18.8	16 - 18.8	20.3 - 23	19.8 - 22.3	18 - 19.5	16.6 - 22.2	17.8 - 21.5	18.9 - 21.5	18.3 - 21.5	-	14.4 - 17.4	15.6 - 18.7	15.3 - 18.4	12.9 - 16.6	-	15.9 - 19.6	15.3 - 18.7	12.6 - 17.2	15 - 18.7	17.8 - 19.4	14.9 - 16.7	0 - 3
		45	ITS1	-	55.5 - 57.5	49.2 - 51.6	57 - 58.5	-	-	-	67.4 - 68.4	65.9 - 68.7	64 - 66	-	65.7 - 66.8	-	-	43.6 - 44.7	42.6 - 43.7	35.9 - 36.8	33.7 - 36.1	30.7 - 35.7	-	40.9 - 43.6	41.5 - 44.6	-	42.4 - 43.9	0 - 9.8
		10	28S	-	7.7 - 8.1	-	4.7 - 5.1	10.9 - 11.1	10.3 - 10.9	10.7 - 11.1	-	10.7 - 11.1	-	11.1 - 11.5	11.3 - 11.8	-	3.7 - 4.1	4.6 - 5.2	-	-	-	3.7 - 4.7	-	-	6.5 - 8.7	6.3 - 6.7	-	0 - 0.6
	Aurelia coerulea	50	16S	28.2 - 29.2	13.6 - 14.8	-	20.5 - 22.5	20.7 - 21.7	20.2 - 21.5	20.7 - 22	20.2 - 21.5	19.2 - 20.7	20 - 21.2	18.7 - 19.7	20 - 21.2	14.6 - 15.6	14.1 - 15.6	17.7 - 18.5	-	-	12.4 - 13.1	11.1 - 12.1	11.4 - 12.9	10.6 - 11.6	12.1 - 13.6	13.4 - 14.1	-	8.9 - 10.9	0 - 1.8
		182	COI	21 - 22.5	17.2 - 19.4	17.3 - 19.7	17.2 - 19.8	20.7 - 22.5	22 - 23.3	21.1 - 23.1	20.6 - 22.3	19.3 - 22.6	21.6 - 24.1	20.7 - 22.1	20.5 - 22.4	-	16.8 - 19.2	17.8 - 20.5	18.2 - 20.2	16.4 - 20.1	-	15.5 - 18	15.5 - 17.4	14.8 - 18.4	15.8 - 18.9	19.9 - 21.1	17.4 - 19.5	16.2 - 20.2	0 - 2.9
		11	ITS1	-	53.4 - 55.4	49.5 - 50.5	57.8 - 58.9	-	-	-	68.3 - 69.5	66.7 - 69.9	65 - 67.3	-	66.9 - 68.3	-	-	43 - 44.5	41.9 - 43.4	35.4 - 37.5	34.3 - 36.1	29.3 - 33.2	-	37.8 - 40.2	38.9 - 40.8	-	41.4 - 43.1	29.5 - 33.1	0 - 6.7
		26	28S	-	6.7 - 7.3	-	5.1 - 5.9	9.9 - 10.5	9.3 - 10.3	9.7 - 10.5	-	10.1 - 10.9	-	9.9 - 10.7	10.1 - 11	-	3.1 - 3.7	4.4 - 5.2	-	-	-	2.9 - 3.9	-	-	5.2 - 7.7	4.9 - 5.5	-	4.7 - 5.9	0 - 1
	Aurelia limbata	4	16S	27.7 - 27.7	14.1 - 14.3	-	20.1 - 21	20 - 20	19 - 19.2	19.7 - 20	20.2 - 20.5	19.7 - 20.2	20.2 - 20.7	19.5 - 19.5	20.5 - 20.7	13.6 - 13.6	13.6 - 14.4	16.2 - 16.2	-	-	11.6 - 11.6	9.1 - 9.3	10.6 - 11.4	9.8 - 9.8	11.1 - 11.6	12.6 - 12.6	-	8.1 - 8.9	5.6 - 6.6	0 - 0.3
		3	COI	21.6 - 22.3	18 - 19	17 - 18.2	16.7 - 18.4	20.2 - 21.2	22.2 - 22.6	20.6 - 21.8	20.7 - 21.2	15.5 - 21.4	23 - 23.9	21.4 - 22.1	21.5 - 23.2	-	18.2 - 19.2	16.5 - 17.8	16.2 - 17.5	17.3 - 19.9	-	15.5 - 17.3	13.2 - 17.4	14.3 - 17.5	15.3 - 17.7	16.9 - 17.5	15.5 - 16	14.4 - 16.6	13.5 - 16.1	0.8 - 1.2
		7	ITS1	-	54.5 - 56	51.3 - 51.5	58.1 - 58.4	-	-	-	68.1 - 68.8	66.5 - 69.2	64.5 - 65.9	-	66.2 - 67	-	-	42.9 - 43.5	44.4 - 45	38.4 - 39	36.6 - 36.9	30.9 - 33.7	-	39.9 - 41	38.1 - 39.5	-	44 - 44.6	33 - 36.5	21.6 - 24.6	0 - 1.6
		1	28S	-	7.3 - 7.3	-	5.9 - 5.9	10.9 - 10.9	10.3 - 10.7	10.7 - 10.9	-	11.1 - 11.3	-	11.1 - 11.3	11.3 - 11.6	-	4.1 - 4.1	5.2 - 5.4	-	-	-	3.9 - 4.5	-	-	5.8 - 7.7	5.5 - 5.5	-	5.3 - 5.7	1.4 - 2.2	NA
	Aurelia hyalina	12	16S	27 - 27.6	14.3 - 14.7	-	19.4 - 20.9	19.7 - 20.3	18.7 - 19.6	19 - 19.9	20 - 20.9	19.5 - 20.6	20 - 21.1	19.2 - 19.9	20.2 - 21.1	13.3 - 13.4	12.8 - 14.2	15.5 - 16.1	-	-	11.4 - 12	8.1 - 9	10.1 - 11.5	9.3 - 10	10.8 - 12	12.3 - 13	-	7.6 - 9	5.6 - 6.5	0.8 - 1.5	0 - 0.6
		12	COI	20.7 - 21.2	14.5 - 16.2	14.5 - 17.3	16.6 - 19.5	18.9 - 19.8	21.4 - 22.3	19.6 - 21.6	21.8 - 22.3	18.7 - 22	21.4 - 22.5	19.1 - 20.4	19.5 - 21.7	-	16.6 - 18.5	16.4 - 18.5	15.4 - 17.2	16.6 - 19.4	-	14.1 - 16.8	12.1 - 15.2	13.3 - 16.4	14.8 - 17.8	16.7 - 18.2	14.5 - 15.6	14 - 16.6	11.2 - 13.8	9.2 - 12.3	0 - 0.2
		1	ITS1	-	56.7 - 57.4	51.1 - 51.1	58.2 - 58.2	-	-	-	68 - 68.3	66.4 - 68.7	63.8 - 64.7	-	65.8 - 66.2	-	-	43.2 - 43.4	45.1 - 45.4	40.5 - 40.5	37.2 - 37.2	30.6 - 32.8	-	41.4 - 42.1	40.4 - 41.2	-	45.1 - 45.1	32.8 - 36.3	21.2 - 23	15.2 - 16	NA
		-	28S	-	-	-	-	-	-	-	-	-	-	-	-	-	-	-	-	-	-	-	-	-	-	-	-	-	-	-	-
