# Supplementary material for: The importance of molecular characters when morphological variability hinders diagnosability: systematics of the moon jellyfish genus Aurelia (Cnidaria: Scyphozoa)
Source: PeerJ. 2021 Sep 9;9:e11954. doi: 10.7717/peerj.11954 (PMC8435205; doi:10.7717/peerj.11954)
Supplement: Supplemental Information 15 — Features in white derive from studies in which specimens were not sequenced, so they should be treated with caution. Features in gray derive from this or other studies that identified specimens based on genetic sequences. Medusa features provided are mostly those that appeared more variable in our MDS analyses and that are further discussed in the manuscript. Continuous and meristic features are presented as single values, ranges (minimum-maximum) and/or as mean ± standard deviation (otherwise stated). All measurements are in mm or as % of f1 (indicated). For more details on polyp and ephyra morphological features see Gambill and Jarms (2014). For details on medusa features see Fig. 1 and Table S3. Species names appear as terminals of the concatenated phylogeny (Fig. 9). [file peerj-09-11954-s015.xlsx]

## Sheet: Table S8
Table S8. Brief morphological description of Aurelia species life cycle stages. Features in white derive from studies in which specimens were not sequenced, so they should be treated with caution. Features in gray derive from this or other studies that identified specimens based on genetic sequences. Medusa features provided are mostly those that appeared more variable in our MDS analyses and tha…
		Previous ID	Polyp				Ephyra				Medusa											Reference
			Total body length	No. of tentacles	Color	No. of strobilation discs	Bell diameter	Marginal lappet shape	No. of gastric filaments	Color	Bell diameter (f1)	No. of lobes (f19)	Proximal gastric diameter (f9)	Distance between gastric pouch proximal edge tips (f35)	Rhopaliar indent (f29)	Non-rhopaliar indent (f30)	No. of perradial branching points (f42)	No. of interradial branching points (f43)	No. of perradial terminations (f39)	No. of interradial terminations (f40)	Color
	Aurelia ayla sp. nov.	-	Not known				Not known				70	16	-	-	-	-	-	-	-	-	Gastric filaments and gonads light brown, bell whitish. Margin light brown.	This study
	Aurelia miyakei sp. nov.	Aurelia sp. 11	0.83-0.99	16	Whitish-orangish	-	Not known				Not known											This study
	Aurelia sp. 7	-	Not known				Not known				Not known
	Aurelia insularia sp. nov.	-	0.56-0.92	27-32	Whitish-yellowish	Up to 8	1.81-2.1	Round	4	Yellow-brown	Not known											This study
	Aurelia mianzani sp. nov.	Aurelia sp. 16	Not known				Not known				263.55	-	8.75	2.35	-	-	58.5	46	35.5	30	Gastric filaments and gonads orangish, bell whitish.	This study
	Aurelia sp. 12	-	Not known				Not known				Not known
	Aurelia sp. 13	-	Not known				Not known				Not known
	Aurelia rara sp. nov.	-	Not known				Not known				79	16	11	-	2	1	-	-	-	-	Cream, pale pink, light brown.	Chiaverano et al., 2016
	Aurelia marginalis	Aurelia sp. 9	0.6-2.7 (1.4 ± 0.4)	16	Cream, light brown	3-9 (5 ± 2)	0.5-3 (2 ± 0.4)	-	-	Pale pink, cream	31-410 (231 ± 93)	16	9-37 (18 ± 7)	-	0.6-17 (8 ± 4)	0.2-8 (4 ± 2)	-	-	-	-	Pink, dark pink, purple.	Chiaverano and Graham, 2017 (Polyp, Ephyra); Chiaverano et al., 2016 (Medusa)
	Aurelia montyi sp. nov.	-	Not known				Not known				30-265 (145 ± 54)	16	8-23 (15 ± 3)	-	1-10 (4 ± 2)	0.3-6 (2 ± 1)	-	-	-	-	Brownish, pale pink, cream.	Chiaverano et al., 2016
	Aurelia smithsoniana sp. nov.	Aurelia sp. 15	Not known				Not known				148.38	8	-	-	-	-	-	-	-	-	Gastric filaments and gonads orangish, bell translucent. Margin orangish.	This study
	Aurelia cebimarensis sp. nov.	Aurelia sp. 2	2.13-2.97	16	Whitish-orangish	Up to 4	2.65-2.96	Round	4	Light brown, yellow	150.39-220.21	16	9.16-11.94 (% of f1)	2.61-5.09 (% of f1)	2.94-5.34 (% of f1)	1.41-1.5 (% of f1)	45-65	40-55	40-49	35-50	Whitish	This study
	Aurelia sp. 17	-	Not known				Not known				Not known
	Aurelia sp. 14	-	Not known				Not known				Not known
	Aurelia malayensis sp. nov.	Aurelia sp. 4	0.43-0.5	16	Whitish-orangish	-	2.02-2.25	Breadknife shape to round	4	Yellow-brown	-	-	-	-	-	-	-	-	-	-	Translucent, white.	This study (Polyp); Dawson, 2003 (Medusa)
	Aurelia sp. 3	-	Not known				Not known				-	-	-	-	-	-	-	-	-	-	Translucent, white, lilac-purple, blue.	Dawson, 2003
	Aurelia clausa	Aurelia sp. 6	Not known				Not known				80-100	16	-	-	-	-	-	-	-	-	Gastric filaments and gonads red-wine, bell whitish with pink lines. Margin pinkish.	Lesson, 1830; Mayer, 1910
	Aurelia dubia	-	Not known				Not known				130	8	-	-	-	-	-	-	-	-	-	Vanhöffen, 1888
	Aurelia solida	Aurelia sp. 8	2.9 ± 0.1	16	Pinkish	Up to 20	2.8 ± 0.1	Breadknife shape	1-2	Milky-transparent	151.29 ± 4	8	11.43 ± 0.86 (% of f1)	-	3.47 ± 0.1 (% of f1)	1.75 ± 0.16 (% of f1)	-	-	-	-	Gastric filaments and gonads rose-violet, bell salmon-light.	Scorrano et al., 2016
	Aurelia labiata	-	Average from 2.02 to 3.67	~16	Orange or light orange, some parts might be milky white	Average from 6 to 7	Average from 3.37 to 3.97	Breadknife-like	-	Reddish-brown	Up to 450	16	-	-	-	-	-	-	-	-	Yellowish or light violet but translucent.	Gambill and Jarms, 2014 (Polyp, Ephyra); Jarms and Morandini, 2019 (Medusa)
	Aurelia columbia sp. nov.	-	-	16	Orangish	Up to 9	Not known				Not known											This study
	Aurelia relicta	Aurelia sp. 5	2.2 ± 0.1	16	Whitish-pinkish	Up to 15	3.5 ± 0.2	Breadknife shape, pointed at tip	1-2	Milky-transparent	87.10 ± 7.45	8	10.31 ± 0.60 (% of f1)	-	5.06 ± 0.27 (% of f1)	1.68 ± 0.13 (% of f1)	-	-	-	-	Whitish	Scorrano et al., 2016
	Aurelia persea	-	Not known				Not known				-	-	-	-	-	-	-	-	-	-	Gastric filaments and gonads white, bell translucent. Margin white.	Forskål, 1775
	Aurelia sp. 18	-	Not known				Not known				Not known
	Aurelia aurita	-	Average from 2.82 to 5.23	Average from 15.5 to 16.2	Orange, some parts might be milky white	Average from 14 to 21.1	Average from 2.92 to 3.54	Pointed spoon-like, lancet-like or round spatula-like	-	White translucent, translucent pink or whitish yellow	Up to 400	8	-	-	-	-	-	-	-	-	From colourless, whitish, rose to bluish.	Gambill and Jarms, 2014 (Polyp, Ephyra); Jarms and Morandini, 2019 (Medusa)
	Aurelia coerulea	Aurelia sp. 1	1.74 ± 0.09	16-22	Pinkish	Up to 17	3.72 ± 0.18	Breadknife shape to round to oval	0 or 4	Dark orange, brownish	101.05 ± 7.32	8 or 16	14.55 ± 0.60 (% of f1)	-	3.51 ± 0.22 (% of f1)	1.02 ± 0.09 (% of f1)	-	-	-	-	Gastric filaments and gonads pinkish, bell whitish.	Scorrano et al., 2016; This study (Ephyra - No. of gastric filaments)
	Aurelia limbata	-	0.92-1.45	16	Whitish-orangish	-	-	-	-	Yellowish	Up to 150	8 or 16	-	-	-	-	-	-	-	-	Umbrella translucent but with yellowish tint. Margin can be brown.	This study (Polyp); Jarms and Morandini, 2019 (Ephyra and Medusa)
	Aurelia hyalina	Aurelia sp. 10	Not known				Not known				60-80	8	-	-	-	-	-	-	-	-	Translucent, slightly red.	Brandt, 1835; Mayer, 1910
